# Supplementary material for: Artificial Nanofluidic Iontronic Retina
Source: Research Square preprint supplement (doi:10.21203/rs.3.rs-7316270/v1), 2025-09-03
Supplement: Supplementary file 1 [file a60c1b3f72466ff1c2a02a68.docx]

**Artificial Nanofluidic Iontronic Retina**

Wenchao Liu1, Lian Duan2, Xiangyu Zhang1, Xinyi Zhu1,Yongxin Ge3,4, Jiqing Dai1, Wenbo Chang1, Miliang Zhang1, Ronghua Lan1, Zhijun Hu1, Ruotian Chen3, Kowit Hengphasatporn2, Yasuteru Shigeta2, and Kai Xiao1,*

1Guangdong Provincial Key Laboratory of Advanced Biomaterials, Department of Biomedical Engineering, Southern University of Science and Technology, Shenzhen 518055, P.R. China.

2 Center for Computational Sciences, University of Tsukuba, 1-1-1 Tennodai, Tsukuba, Ibaraki 305-8577, Japan.

3 State Key Laboratory of Catalysis, Dalian Institute of Chemical Physics, Chinese Academy of Sciences, Zhongshan Road 457, Dalian 116023, China.

4 University of Chinese Academy of Sciences, 19A Yuquan Road, Beijing 100049, China.

*****Corresponding author. Email address: xiaok3@sustech.edu.cn.


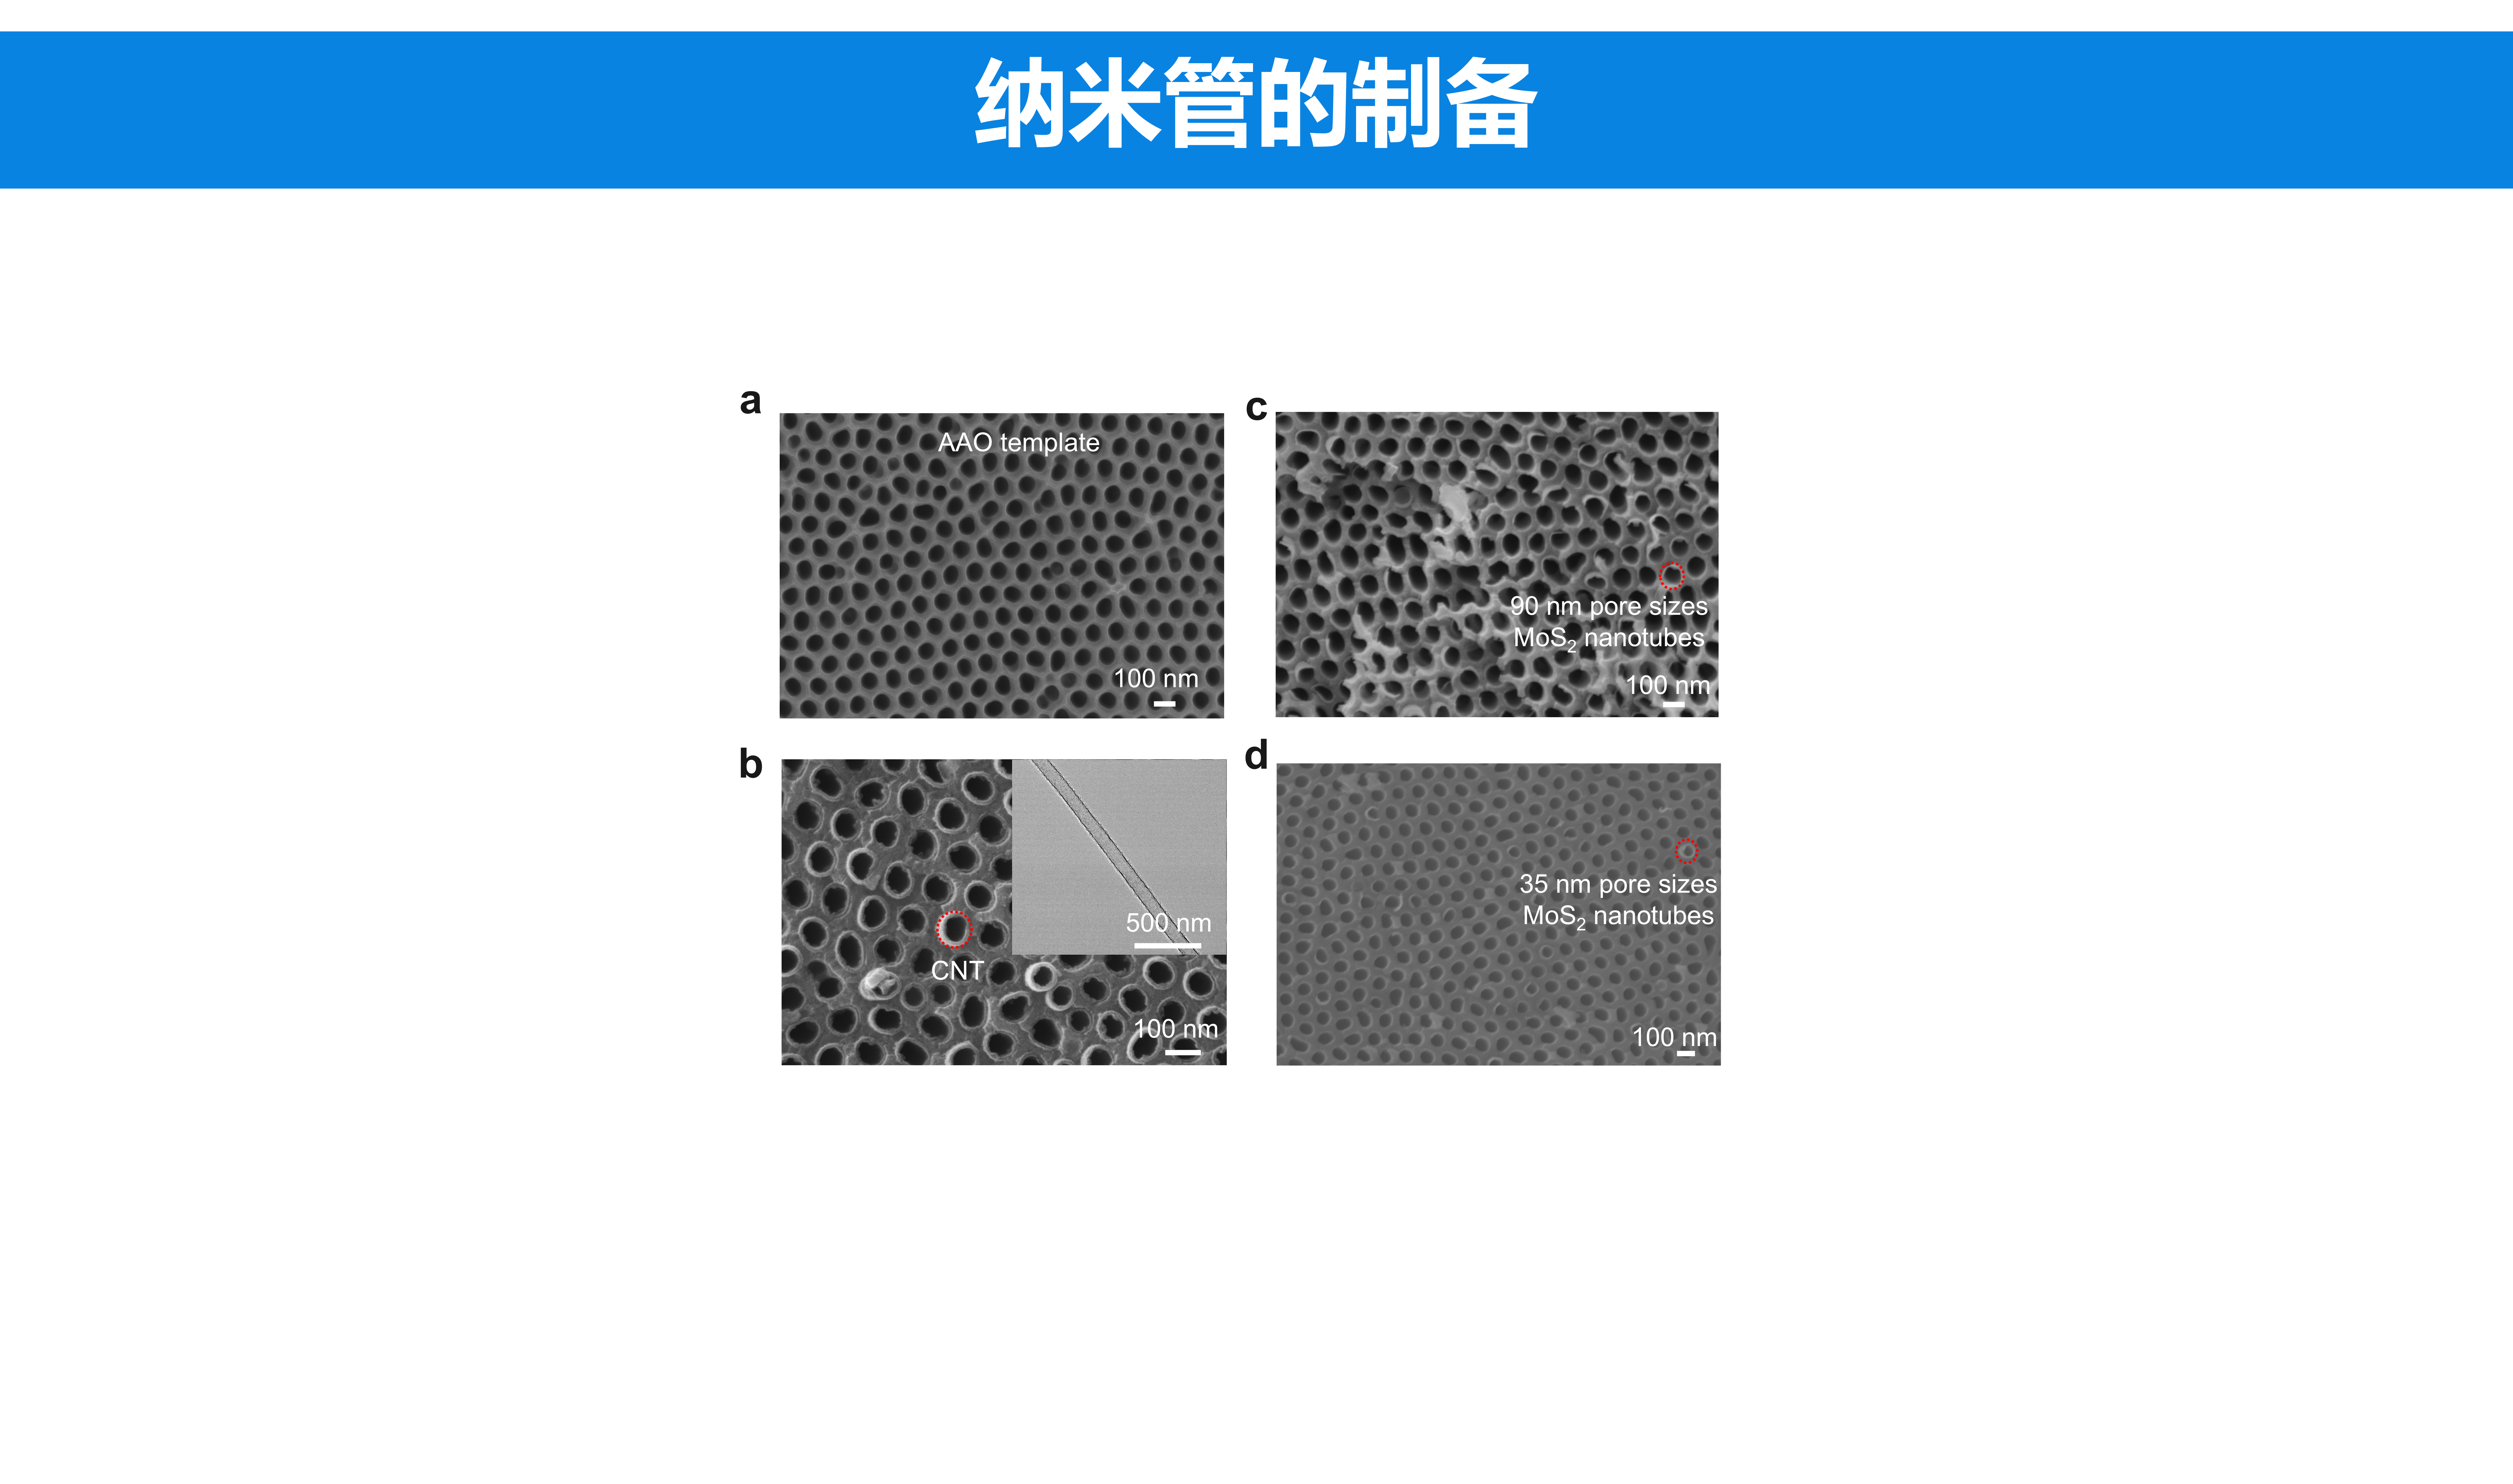


**Fig. S1. Morphology characterizations of different samples. a,** AAO substrate; **b,** CNT; **c,** 90 nm pore sizes MoS₂ nanotubes; **d,** 35 nm pore sizes MoS₂ nanotubes.


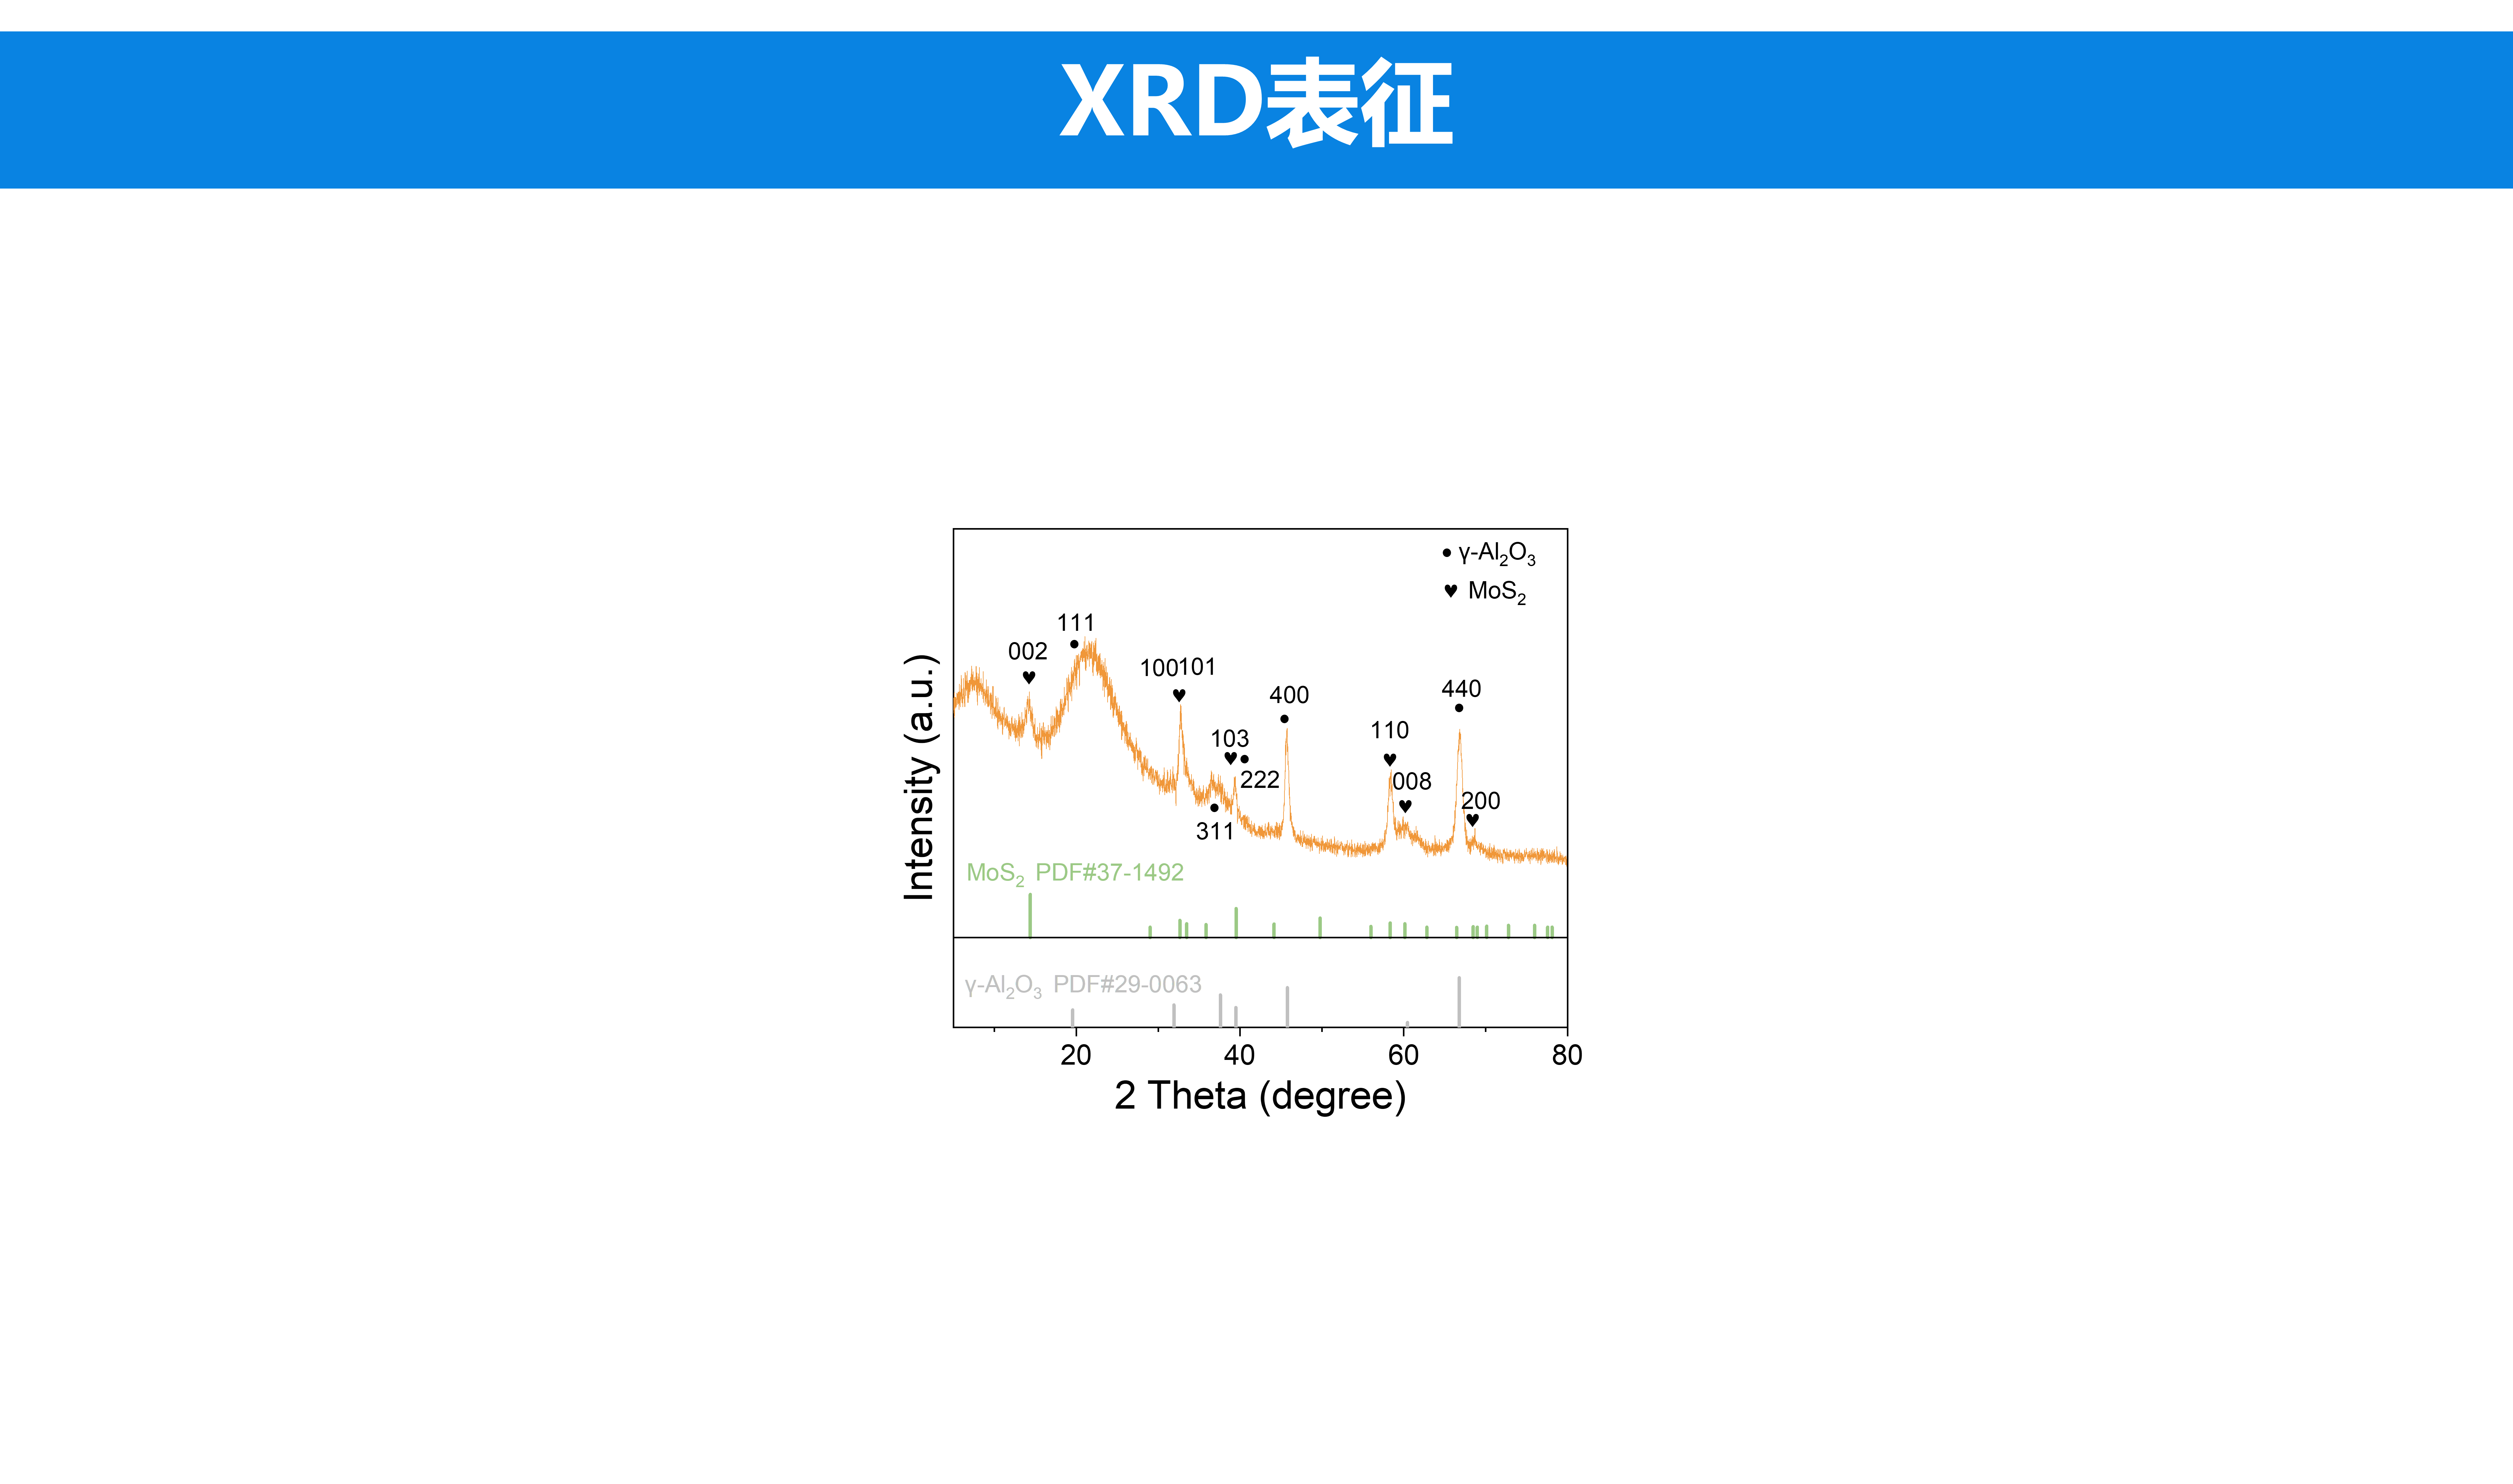


**Fig. S2. XRD characterizations of CNT/MoS₂ nanotube heterostructure.** Comparative analysis with standard reference cards reveals distinct diffraction peaks corresponding to Al₂O₃ from the AAO template and crystalline MoS₂. Notably, the diffraction peaks observed at (002), (100), (101), (103), (110), (008), and (200) planes are indexed to the 2H-MoS₂ phase with hexagonal symmetry (space group P6₃, PDF# 37-1492). The sharp characteristic peaks demonstrate excellent crystallinity of the synthesized MoS₂ nanotubes. However, a discernible attenuation in diffraction intensity at the (002) plane compared to pristine MoS₂ standard suggests structural modification, potentially attributed to disrupted van der Waals interactions in the S-Mo-S layers through lattice disorder induced by CNT incorporation. Concurrently, diffraction features at (111), (311), (222), (400), and (440) planes correspond to γ-Al₂O₃ with face-centered cubic structure (space group Fd3m, PDF# 29-0063), exhibiting precise alignment with reference peak positions. This congruence confirms successful MoS₂ nanotube deposition on the AAO template. The absence of characteristic CNT diffraction peaks implies the predominant presence of disordered graphitic carbon in the hybrid structure, necessitating complementary characterization techniques (e.g., Raman spectroscopy or TEM) for definitive carbon phase identification.


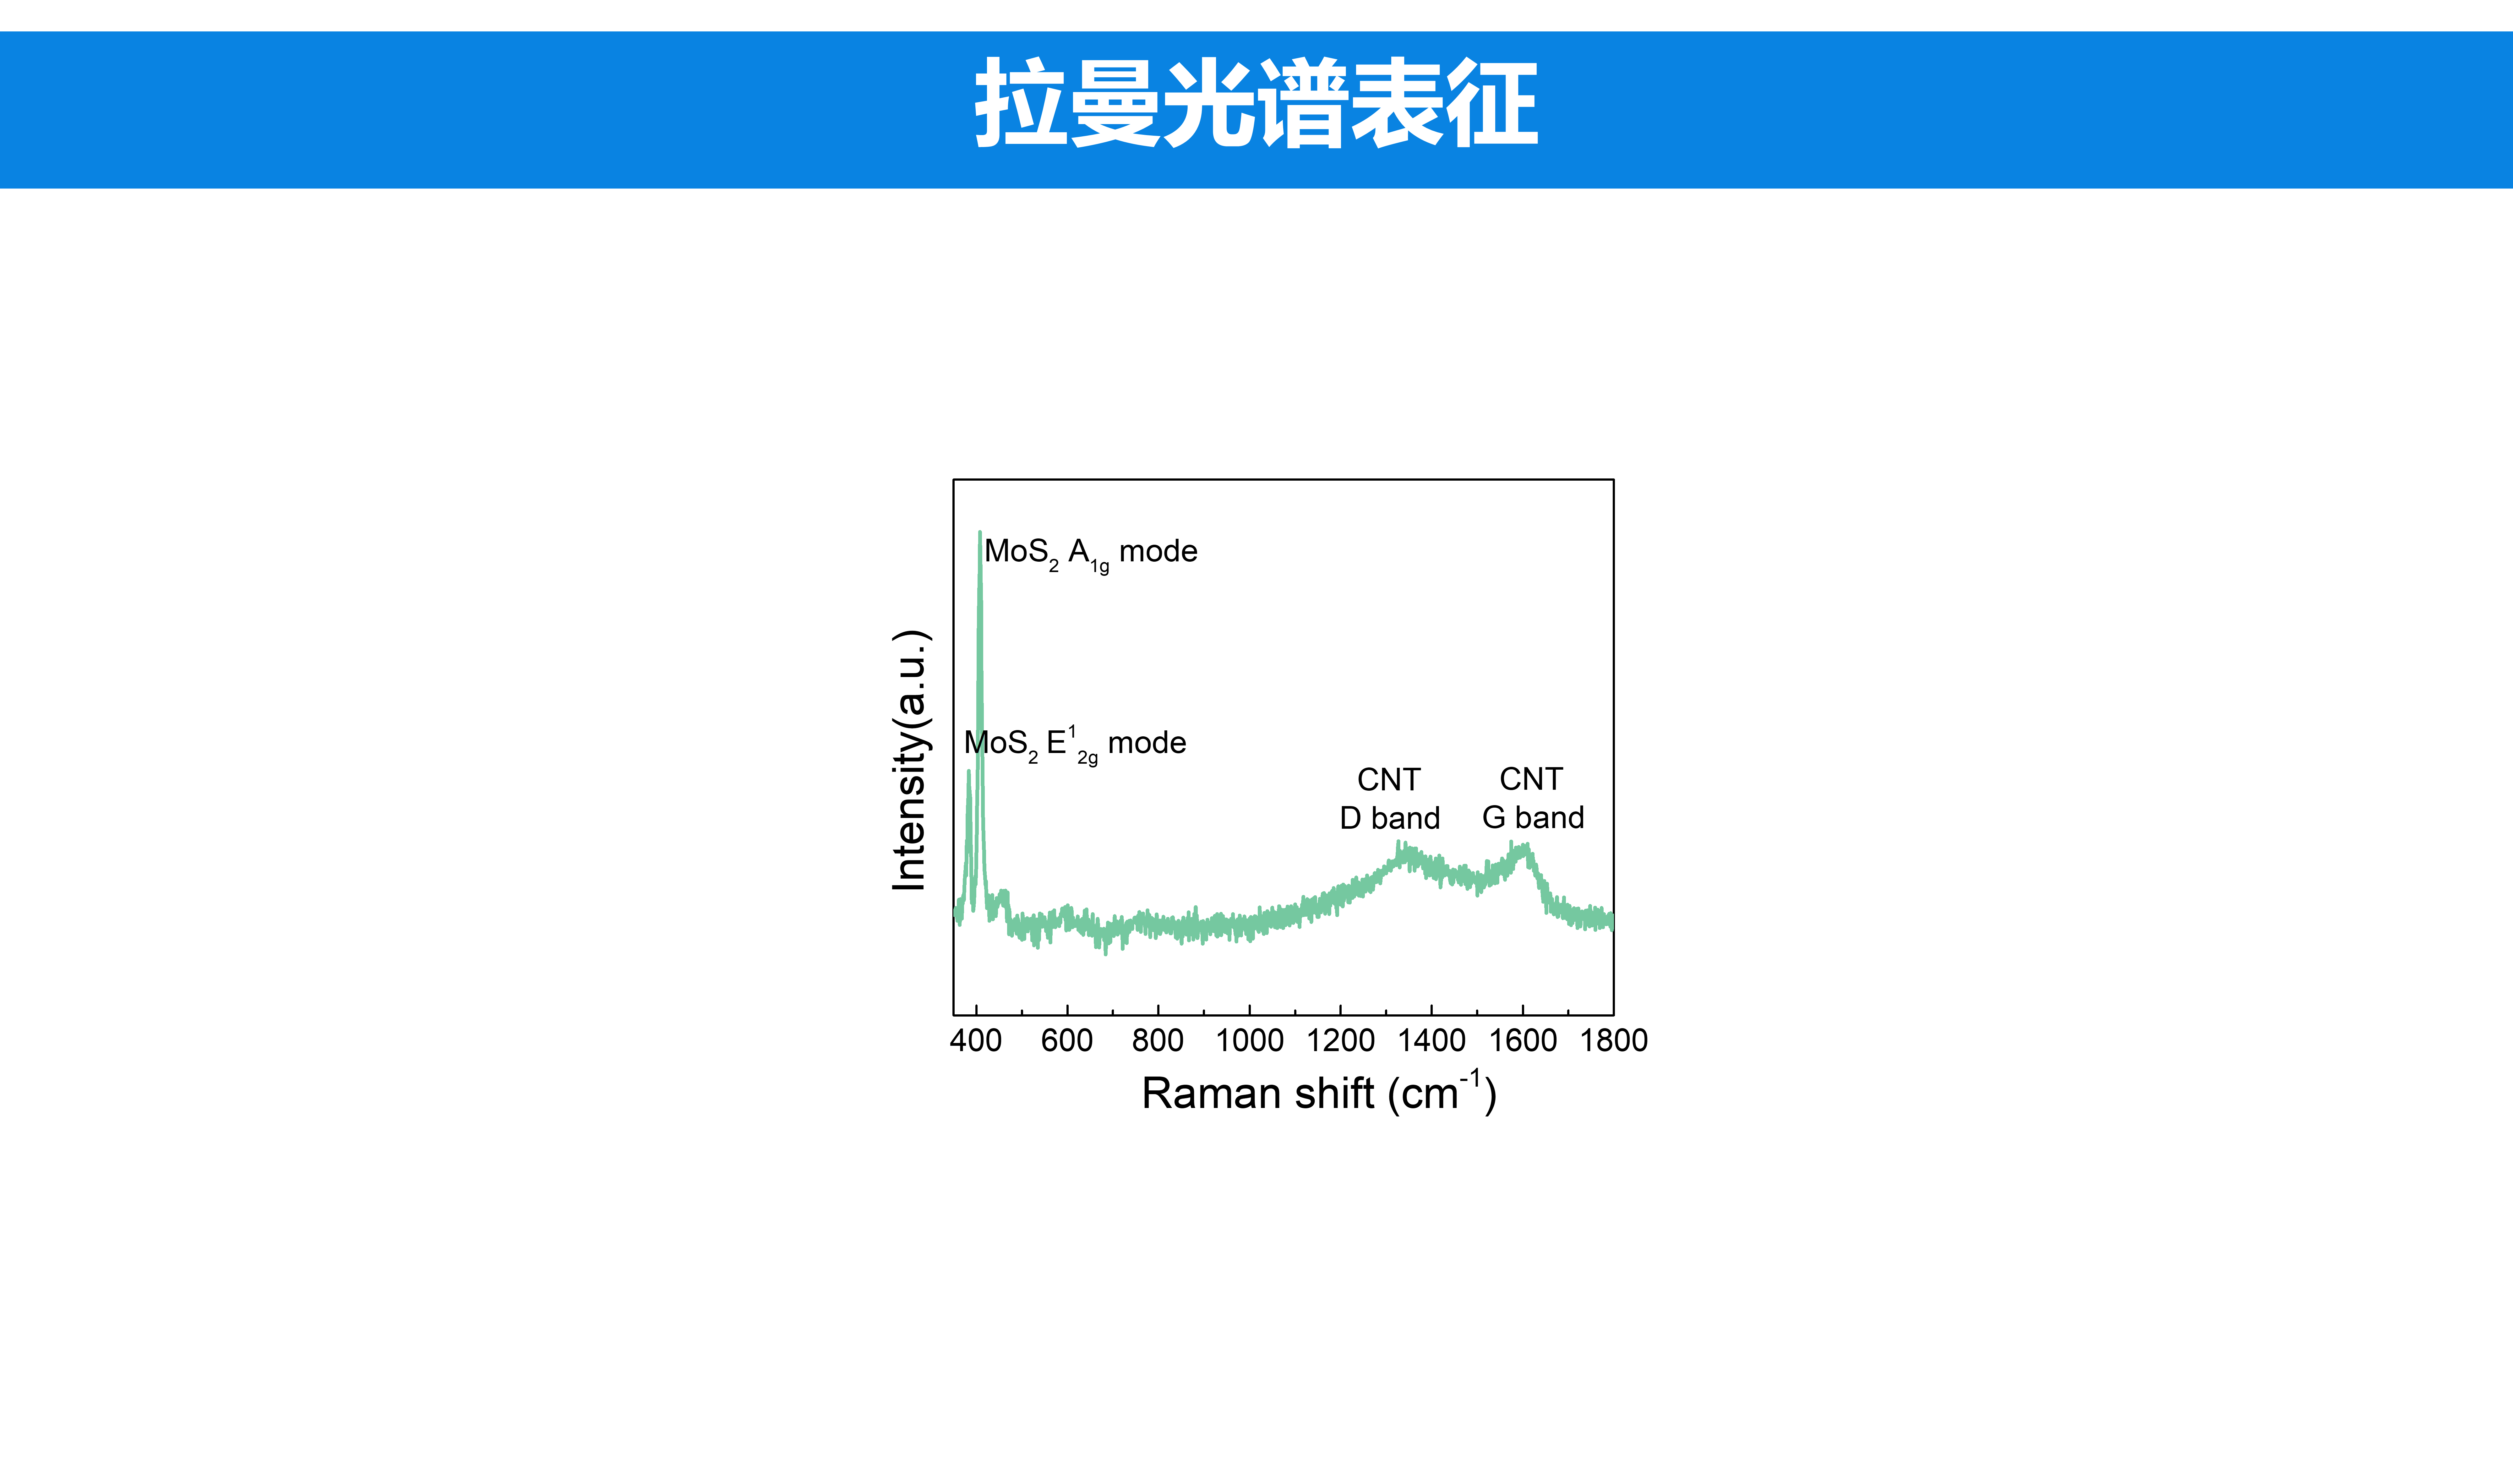


**Fig. S3. Raman spectra characterizations of CNT/MoS₂ nanotube heterostructure.** The Raman spectrum of the synthesized CNT/MoS₂ nanotube heterostructure exhibits characteristic vibrational signatures of both components. Two distinct peaks located at 1326 cm⁻¹ (D-band) and 1609 cm⁻¹ (G-band) are observed, corresponding to the disorder-induced lattice vibration mode and the in-plane stretching vibration of sp²-bonded carbon atoms in graphitic structures, respectively. The concurrent presence of these features indicates the coexistence of disordered carbon defects and graphitized carbon domains within the heterojunction architecture. Furthermore, the spectrum reveals two well-separated peaks at 383 cm⁻¹ (E2g mode) and 408 cm⁻¹ (A1g mode), which are characteristic of the MoS2 nanotube component. These vibrational modes correspond to the in-plane opposing motions of molybdenum and sulfur atoms (E2g) and the out-of-plane symmetric sulfur atom vibrations along the c-axis (A1g), providing direct evidence of the preserved layered crystal structure in the MoS2 nanotubes within the heterostructure system.


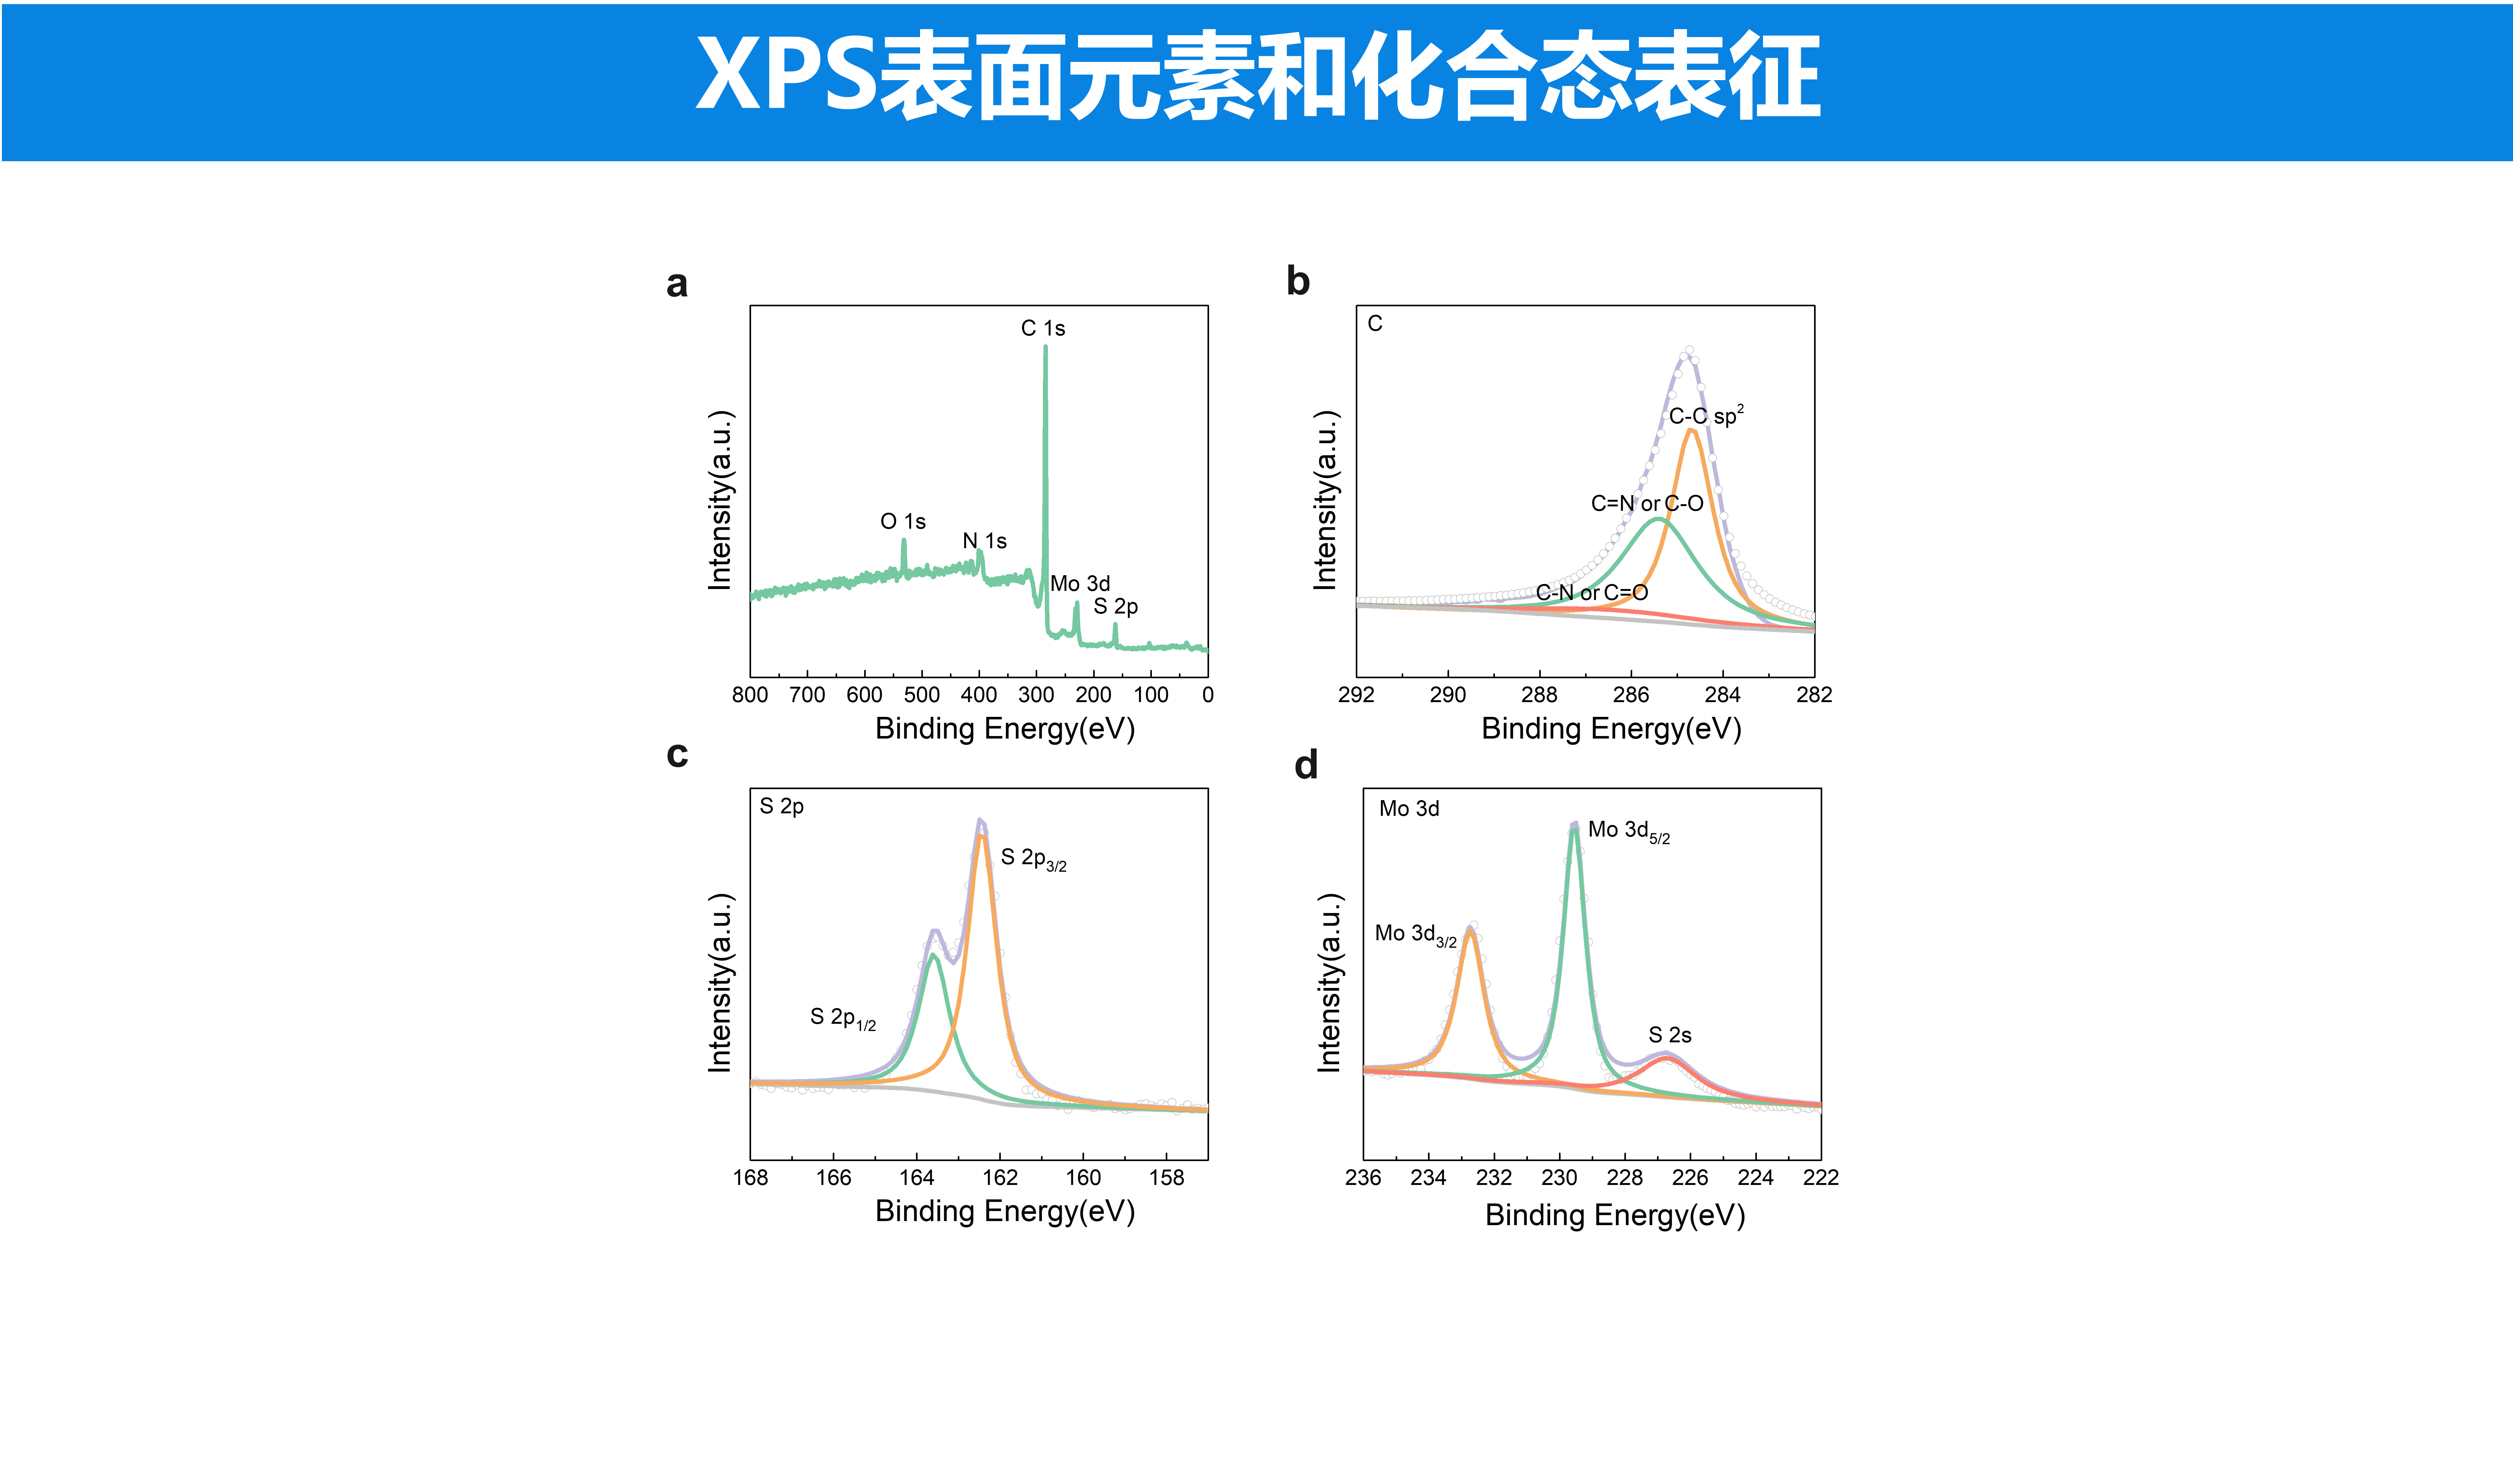


**Fig. S4. X-ray photoelectron spectroscopy characterizations of** **CNT/MoS₂ nanotube heterostructure. a,** XPS survey of CNT/MoS₂ nanotube; **b,** High-resolution C 1sspectra of CNT/MoS₂ nanotube; **c,** High-resolution S 2pspectra of CNT/MoS₂ nanotube; **d,** High-resolution Mo 3dspectra of CNT/MoS₂ nanotube. The elemental mapping analysis of the CNT/MoS₂ nanotube heterostructure reveals distinct distributions of N and C elements, confirming the successful nitrogen doping in the CNT matrix. As evidenced by the high-resolution C 1s spectrum, a predominant peak centered at approximately 284 eV is observed, characteristic of sp²-hybridized carbon in the graphitic framework. This peak exhibit chemical environment complexity through deconvolution into multiple components corresponding to C-C, C=N, C-O, C-N, and C=O bonding configurations. The S chemical state analysis demonstrates two prominent peaks at binding energies of 164 eV and 162 eV, which are respectively assigned to the S 2p1/2 and S 2p3/2 orbitals, unambiguously confirming the presence of S2- species in the heterostructure. Furthermore, the molybdenum oxidation state characterization reveals three distinct peaks at 227 eV, 230 eV, and 233 eV. These correspond to the Mo 3d3/2、Mo 3d5/2 and S 2s transitions respectively, collectively verifying the +4-oxidation state of molybdenum (Mo⁴⁺) in the composite system. The comprehensive XPS analysis provides conclusive evidence for the chemical bonding states and successful formation of the CNT/MoS₂ nanotube heterostructure.


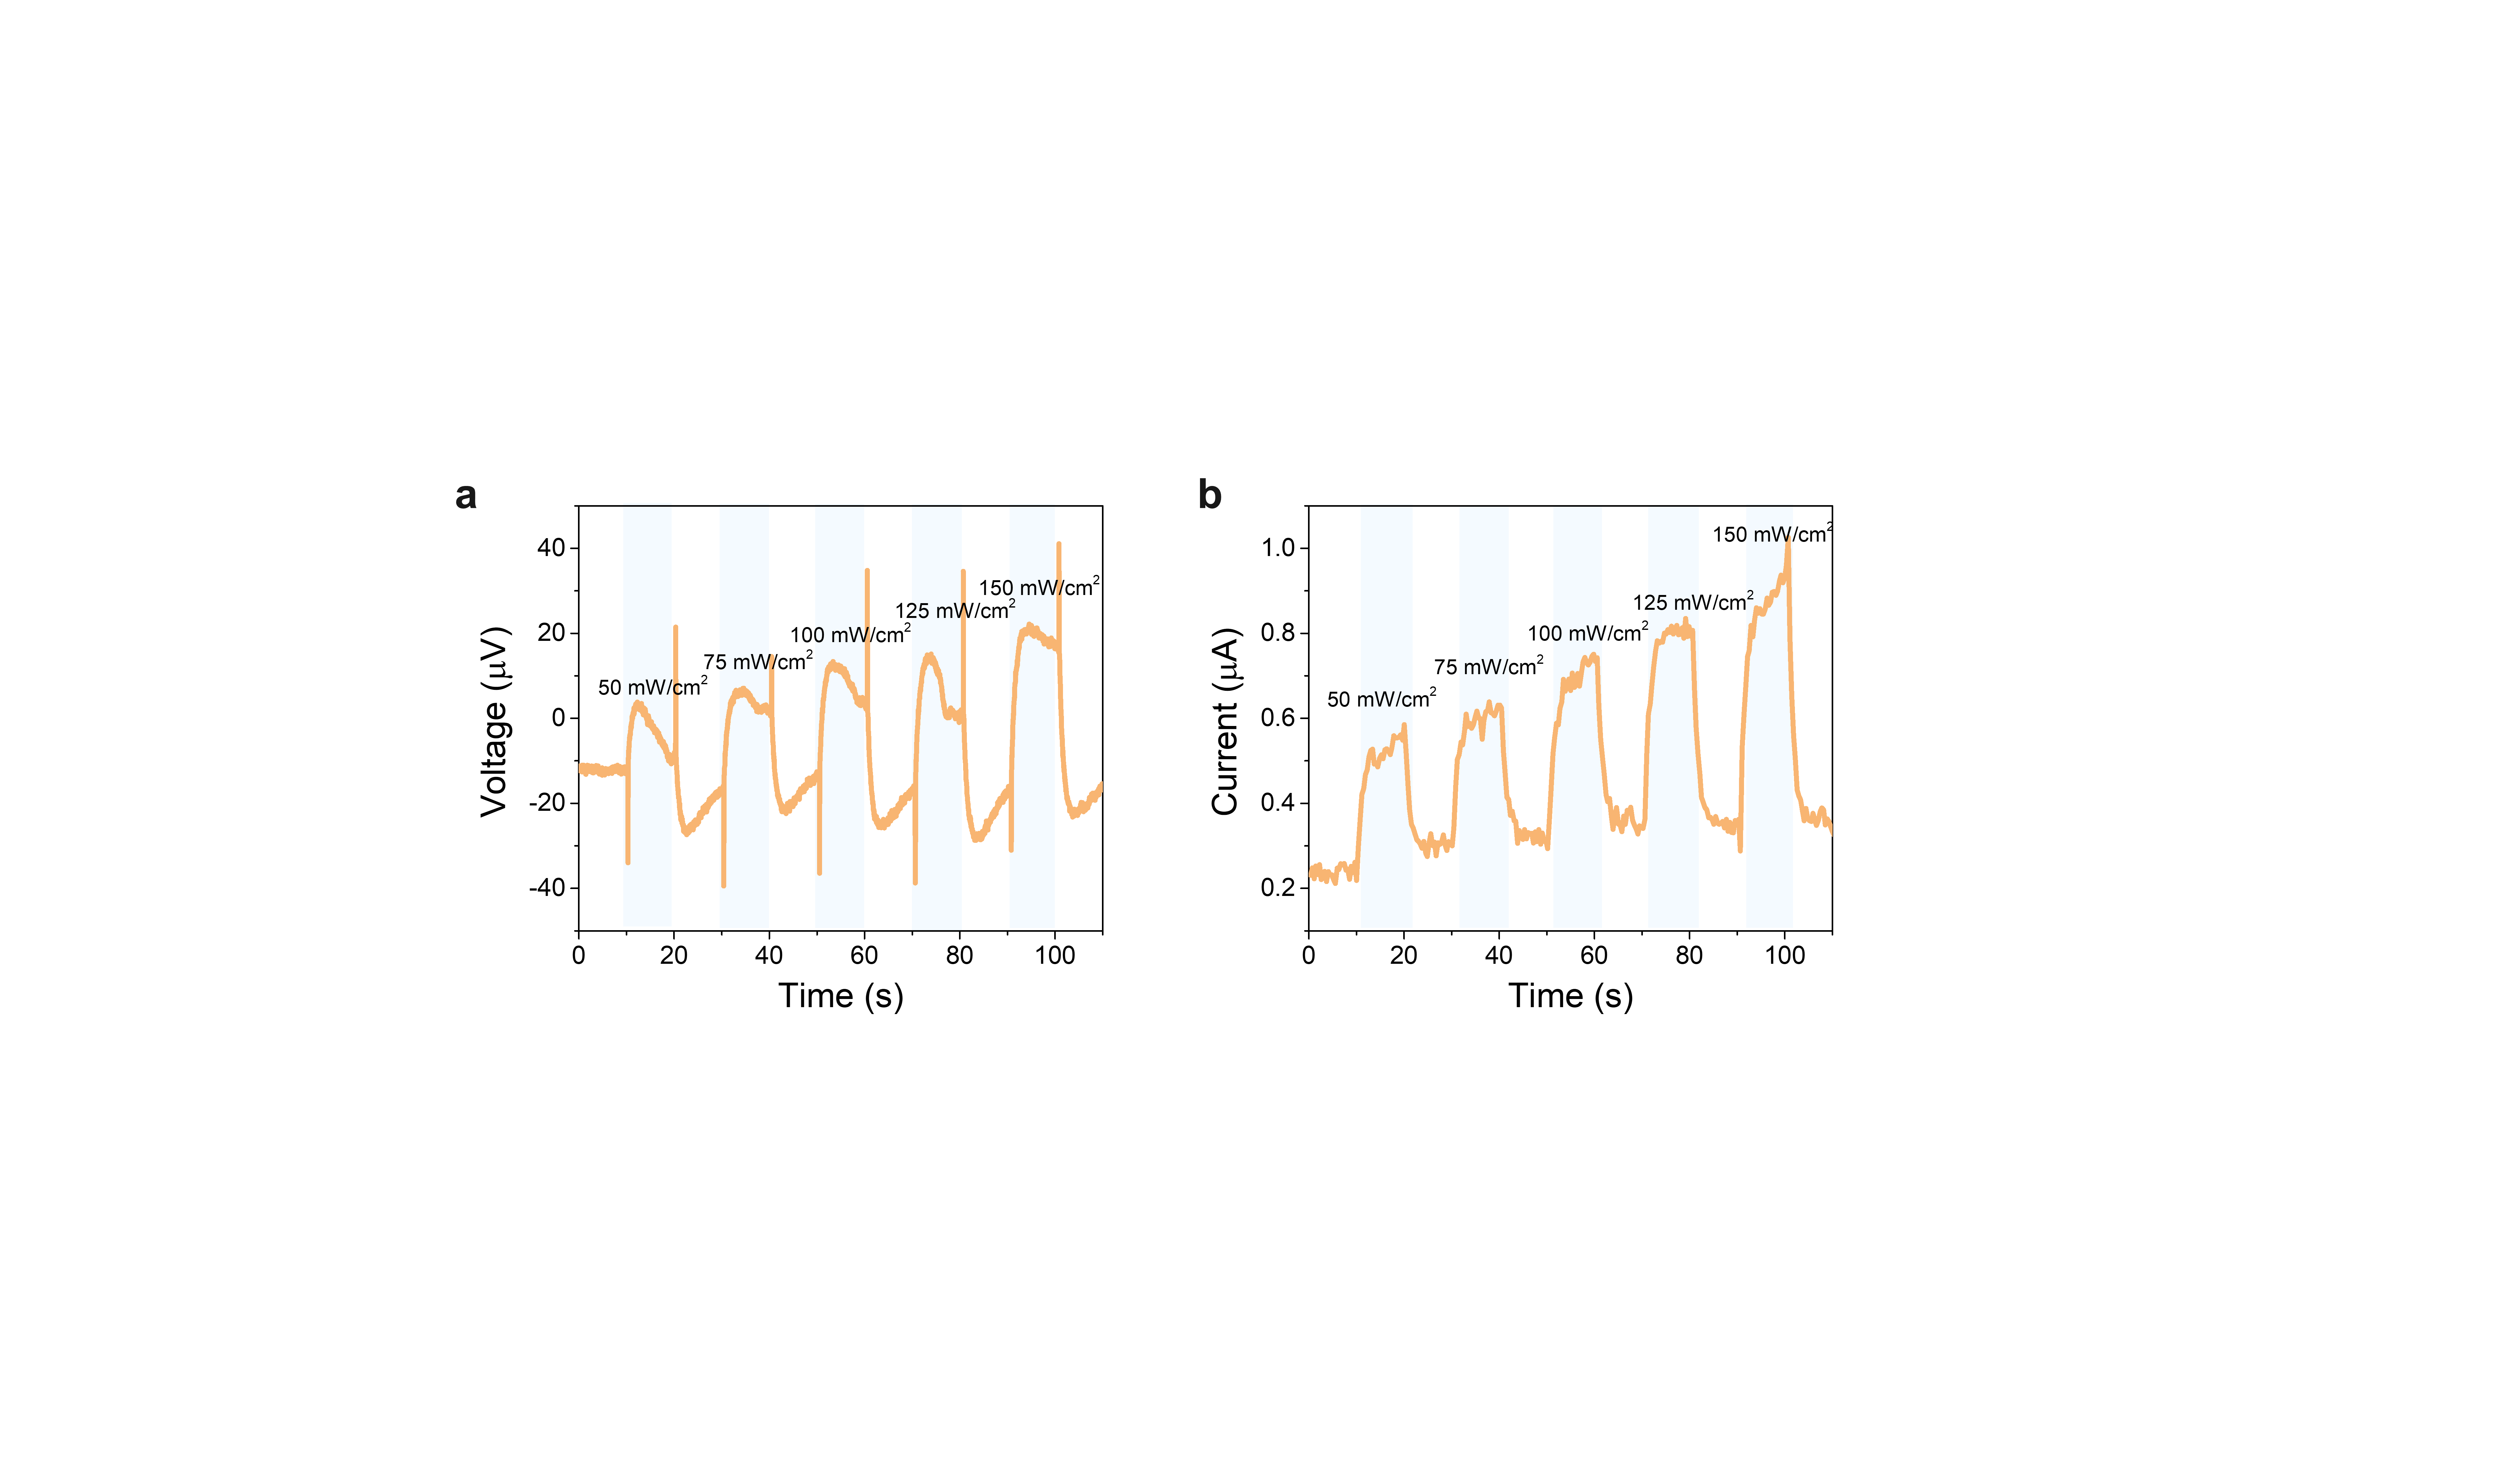


**Fig. S5. Electronic voltage and current variations of CNT/MoS₂ nanotube heterostructure. a,** Electronic voltage variations as a function of light density of 50 mW/cm2, 75 mW/cm2, 100 mW/cm2, 125 mW/cm2, and 150 mW/cm2; **b,** Electronic current variations as a function of light density of 50 mW/cm2, 75 mW/cm2, 100 mW/cm2, 125 mW/cm2, and 150 mW/cm2.


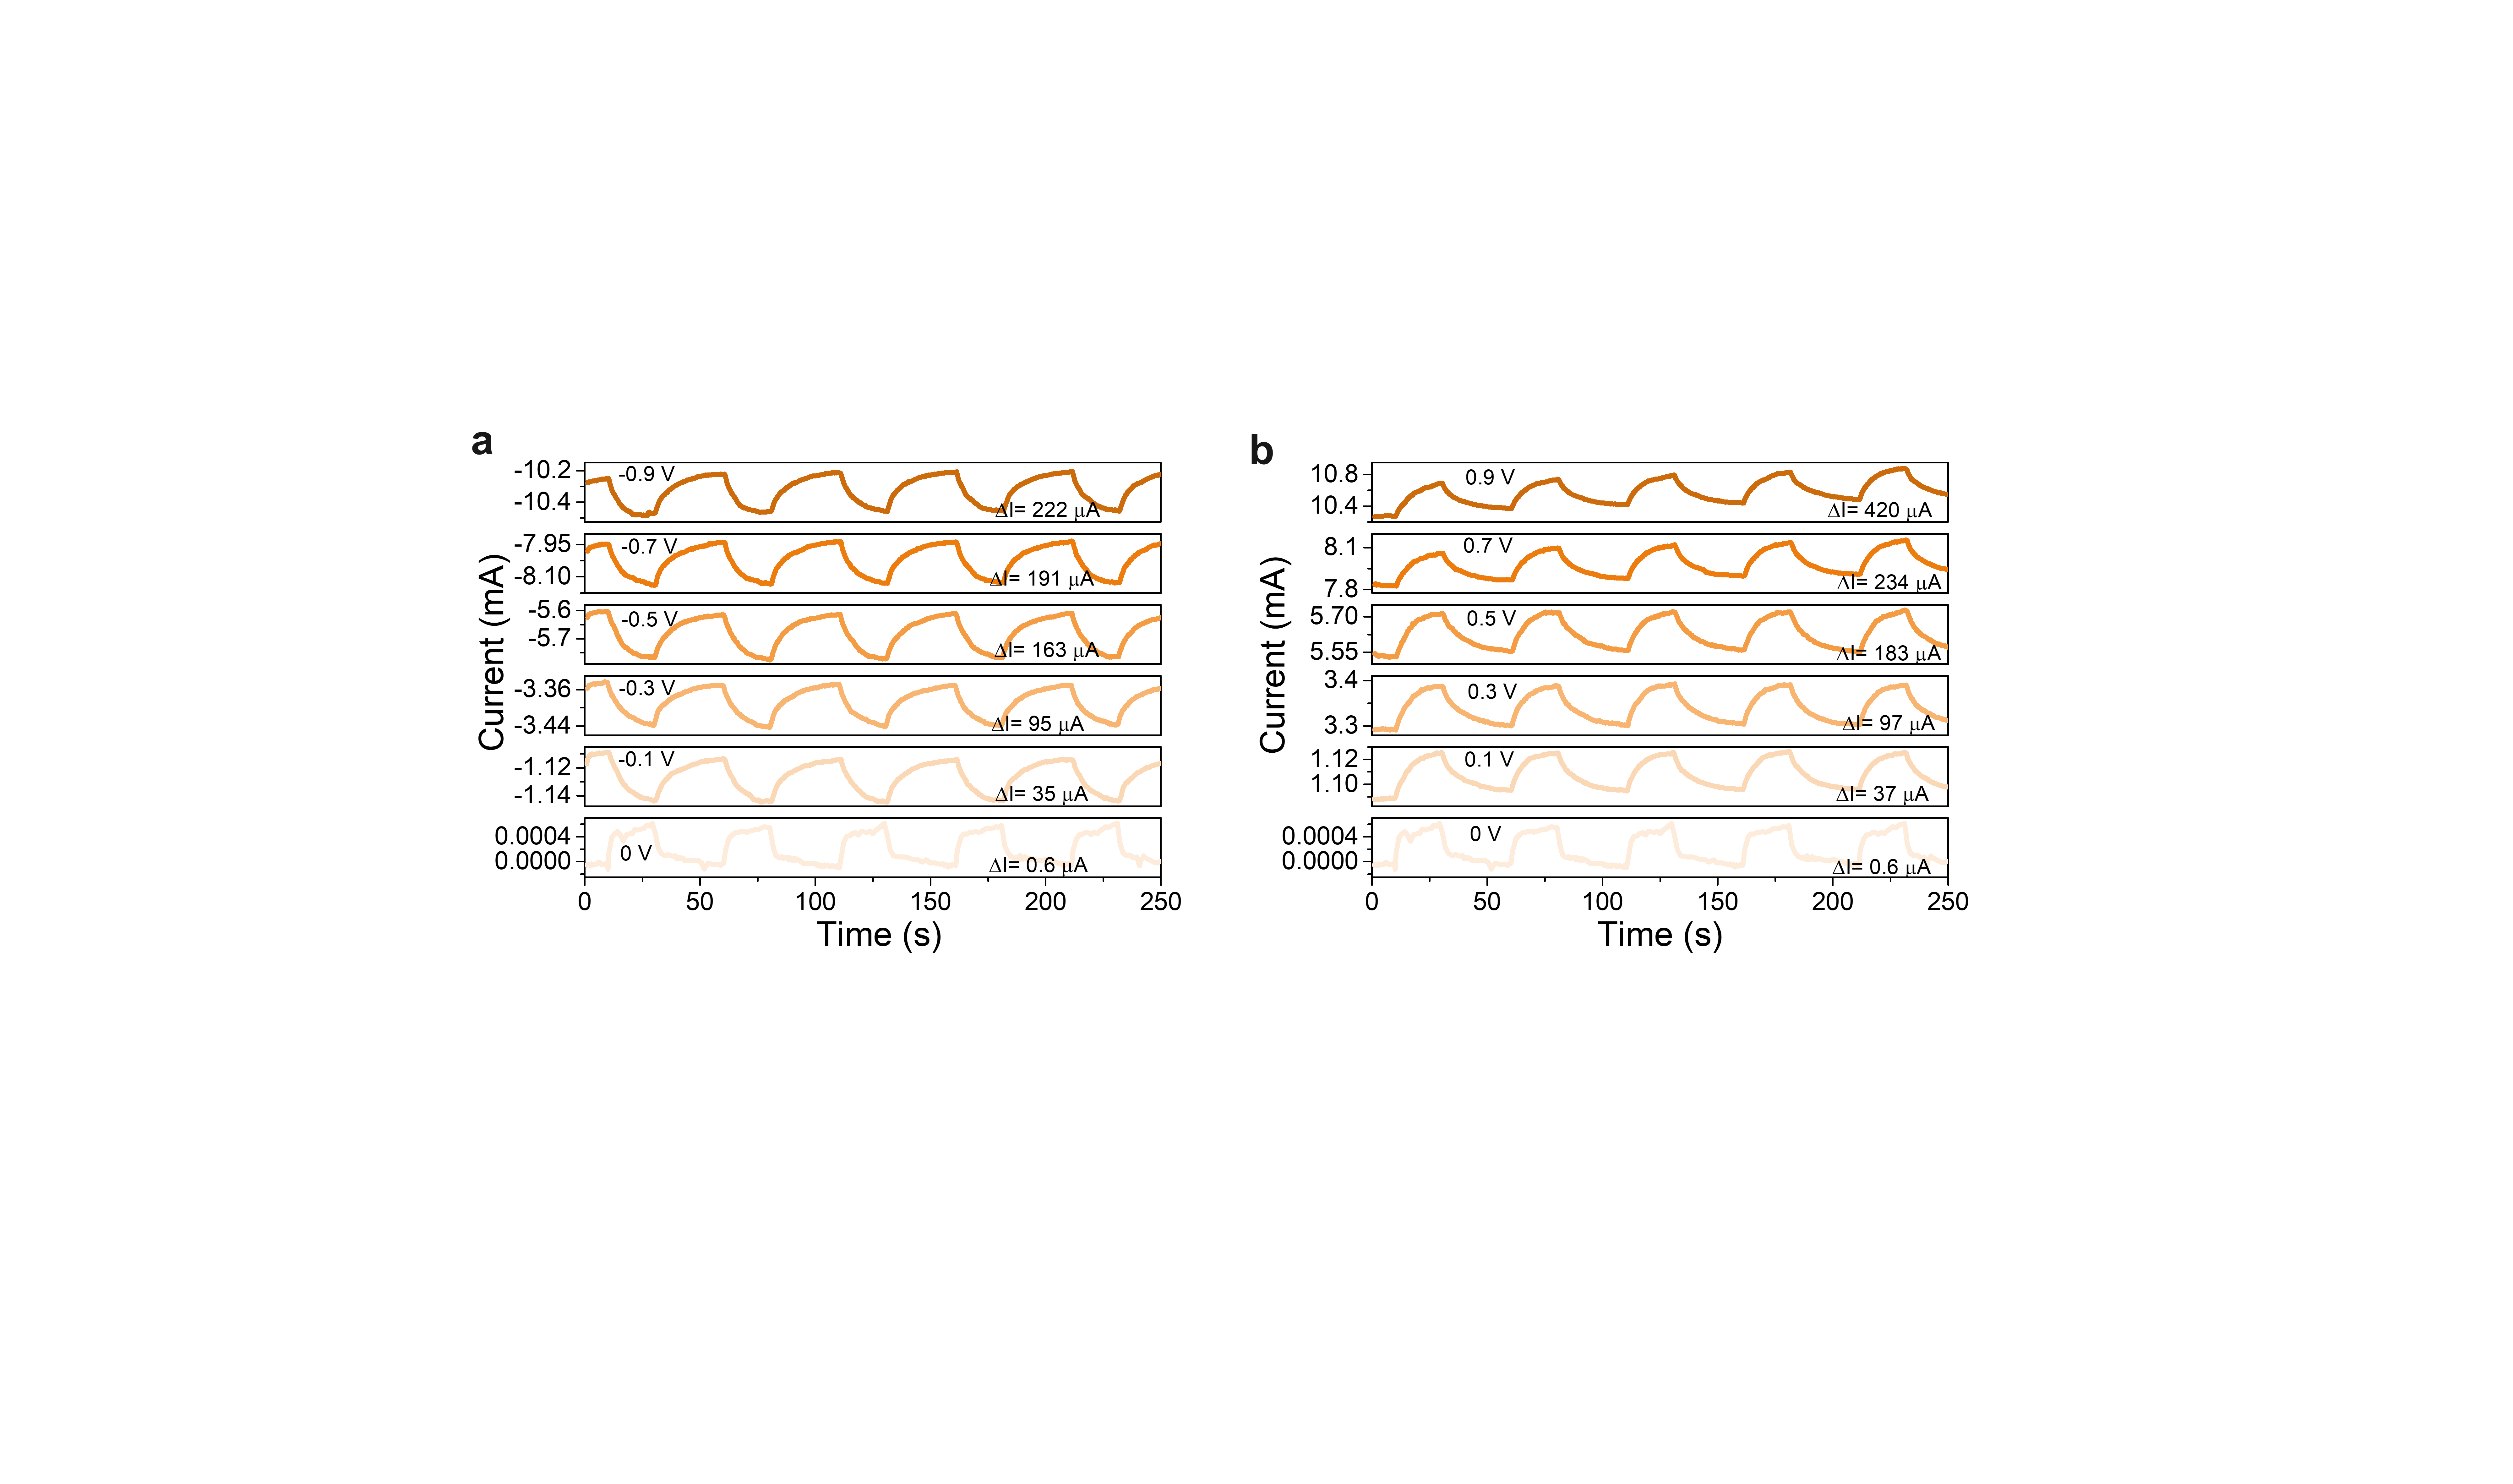


**Fig. S6.** **Electronic current variations of CNT/MoS₂ nanotube heterostructure. a,** Electronic current variations as a function of bias voltage of -0 V, -0.1 V, -0.3 V, -0.5 V, -0.7 V, and -0.9 V under a fixed light density of 150 mW/cm2; **b,** Electronic current variations as a function of bias voltage of 0 V, 0.1 V, 0.3 V, 0.5 V, 0.7 V, and 0.9 V under a fixed light density of 150 mW/cm2.


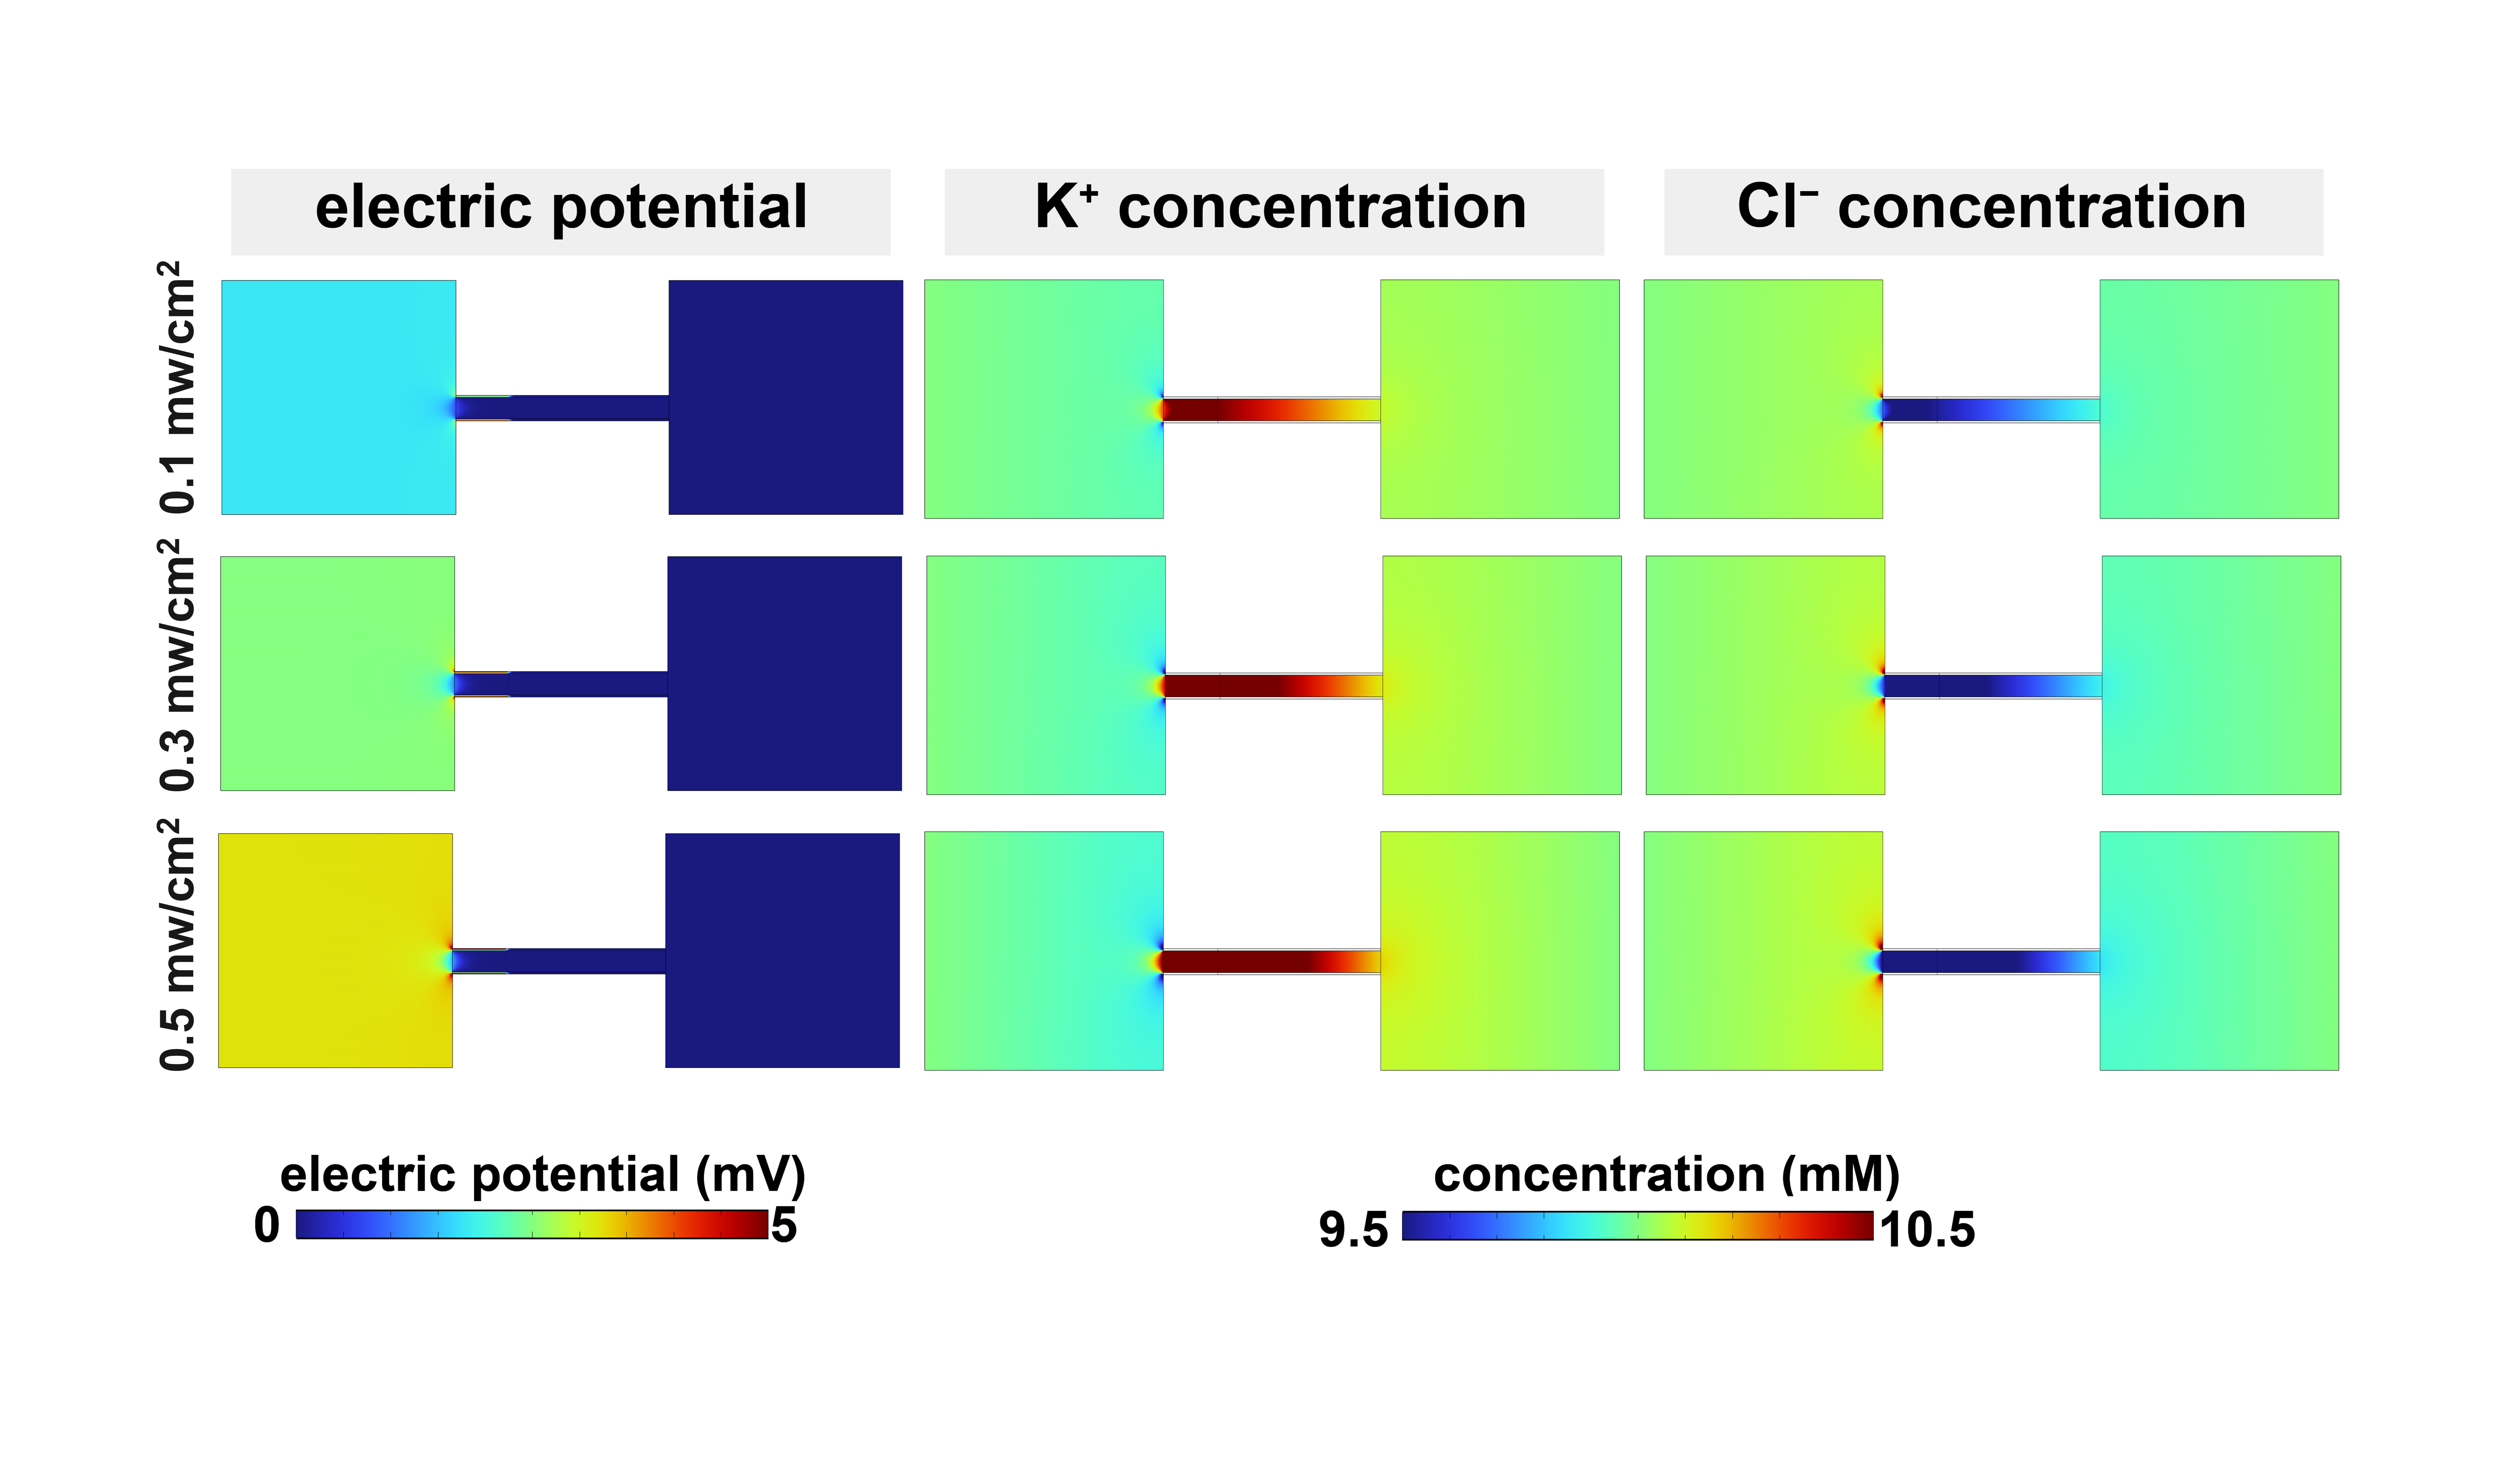


**Fig.** **S7. Numerical simulation of the electric potential and ion concentration distribution (K+and Cl-) of the CNT/MoS2 nanotube heterostructure as a function of light density varied from 0.1 mW/cm2, 0.3 mW/cm2, and 0.5 mW/cm2**.


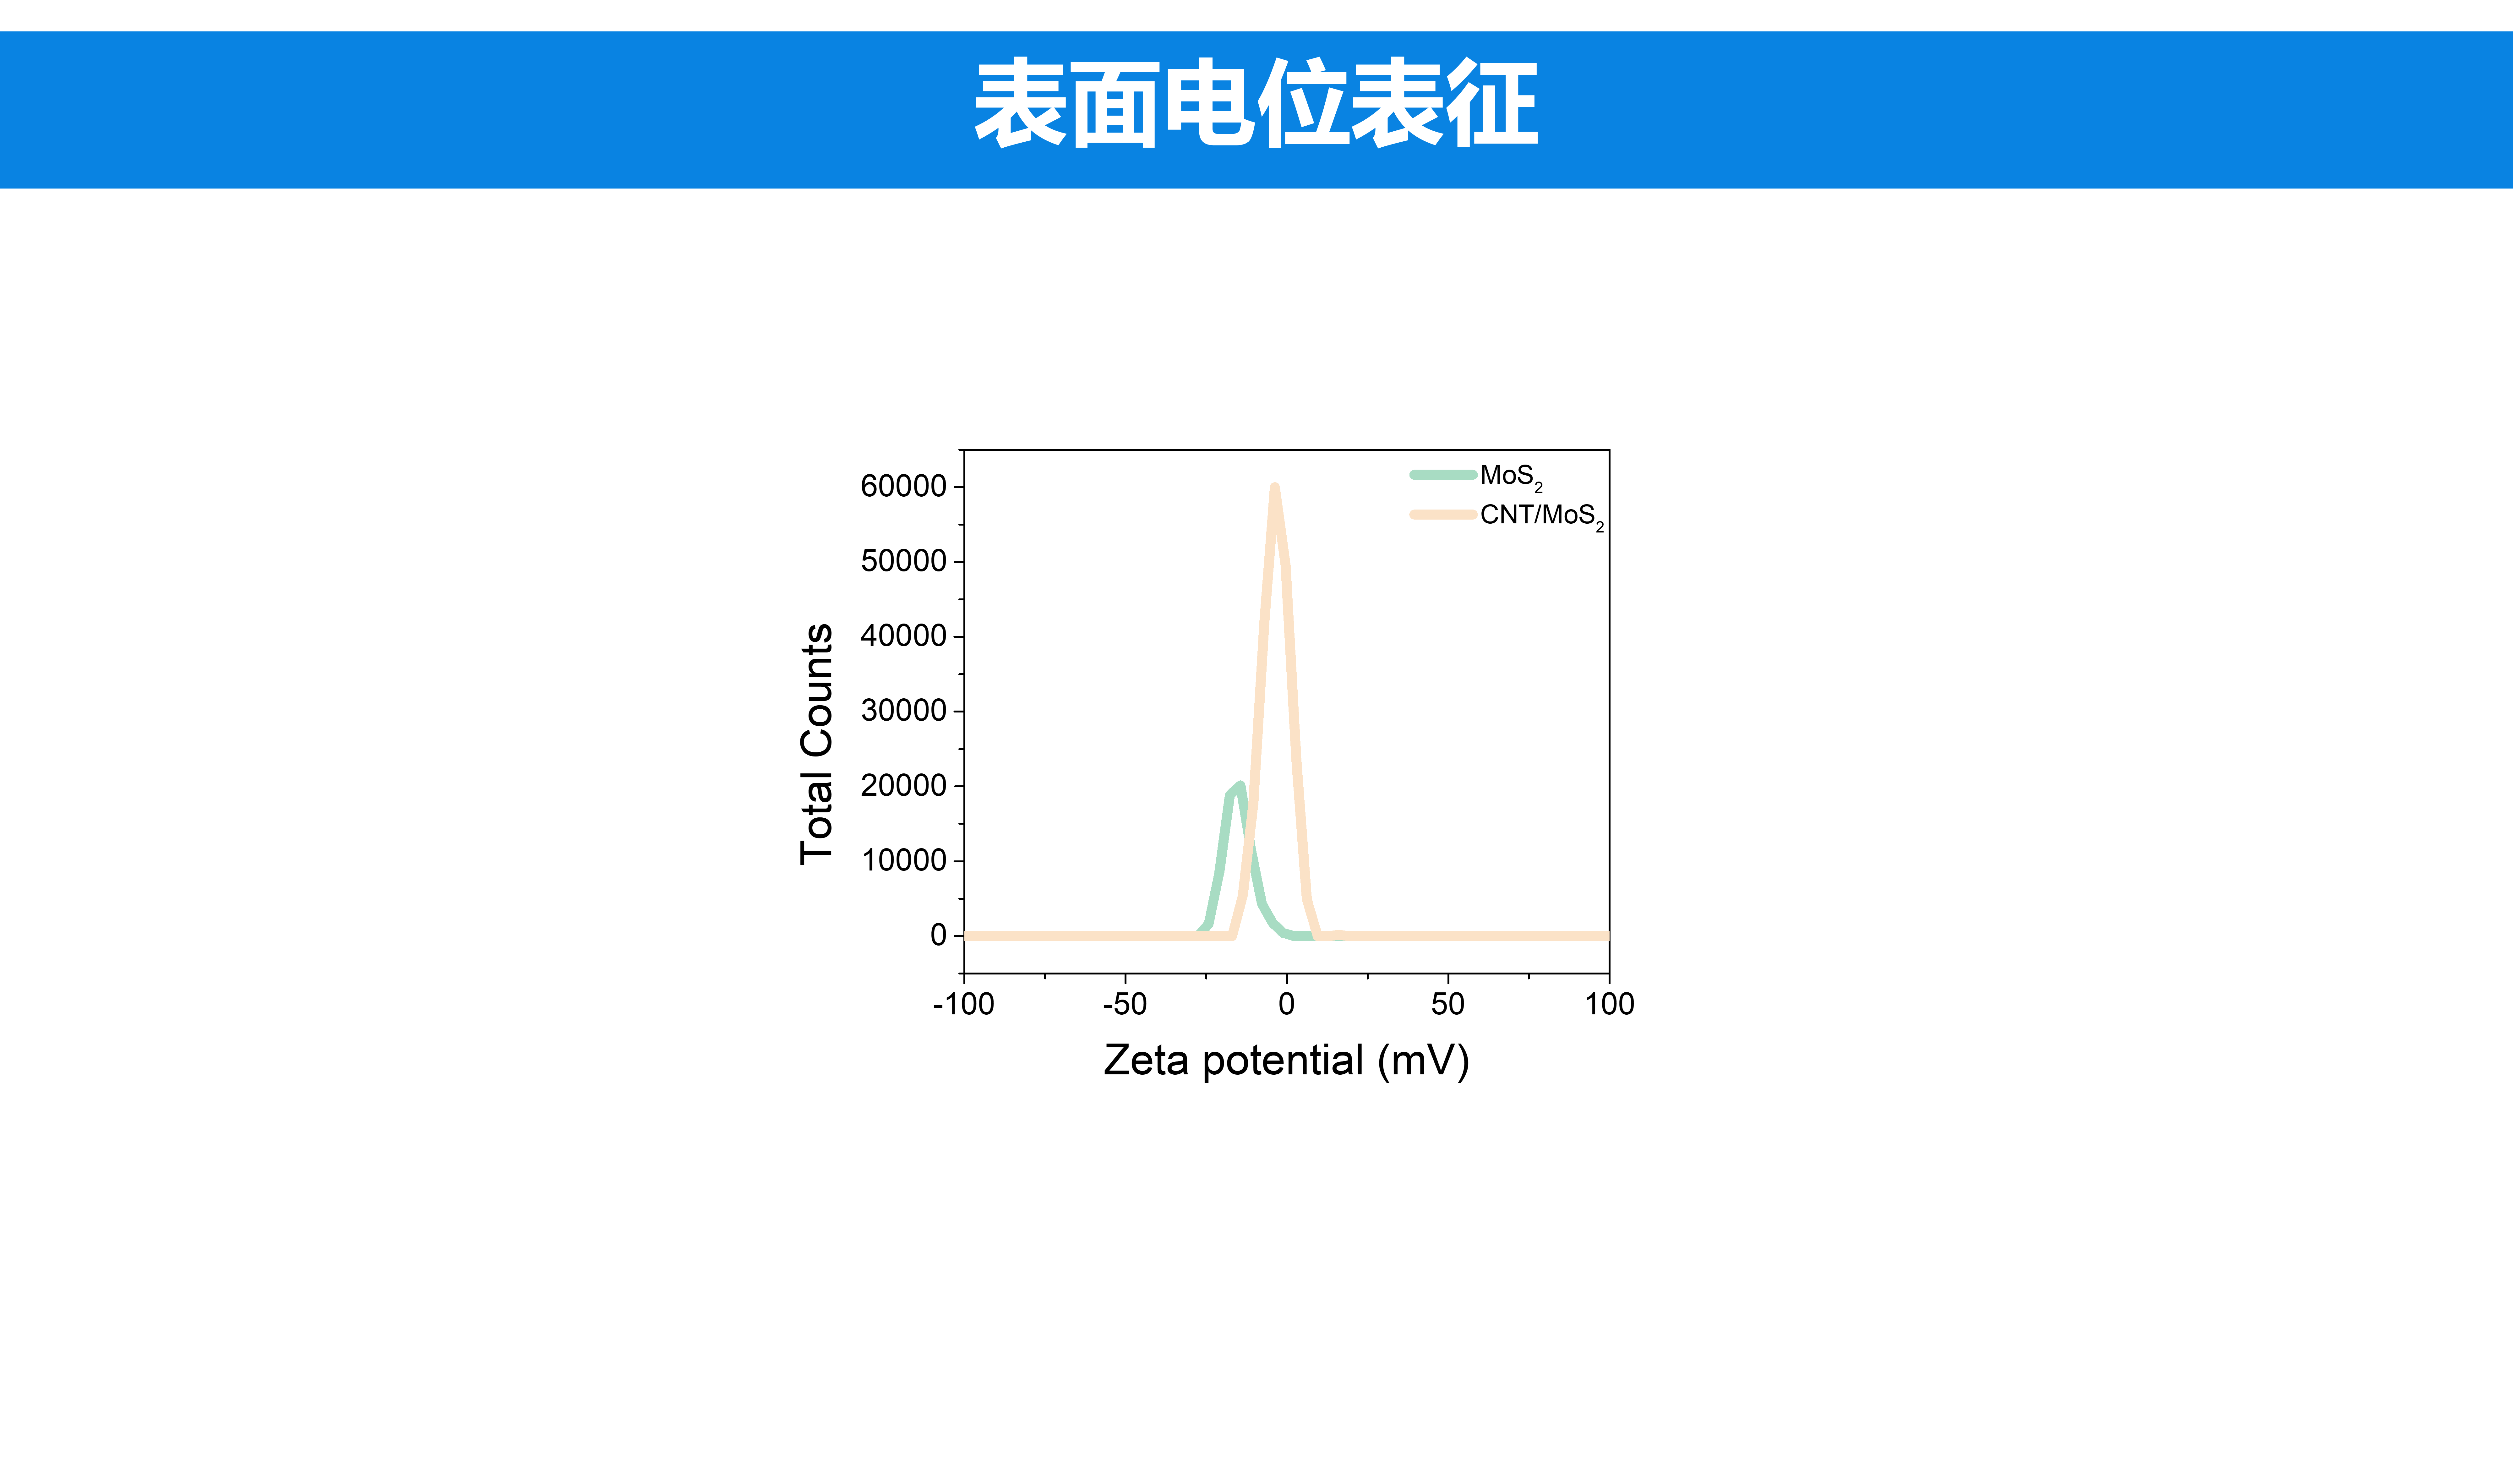


**Fig. S8.** **Zeta-potential characterizations of MoS₂ nanotube and CNT/MoS₂ nanotube heterostructure.** The MoS2 nanotubes and CNT/MoS₂ nanotube heterostructure grown on AAO templates were subjected to template removal through immersion in 14.6 M phosphoric acid for 2 hours. Subsequently, the samples were thoroughly rinsed with ultrapure water to eliminate residual phosphoric acid. The template-free specimens were ultrasonically dispersed in a dilute aqueous solution for surface potential characterization. The MoS2 nanotubes and CNT/MoS₂ nanotube heterostructure exhibited negative surface zeta potentials, demonstrating the presence of negative surface charges on both materials under the tested solution conditions.


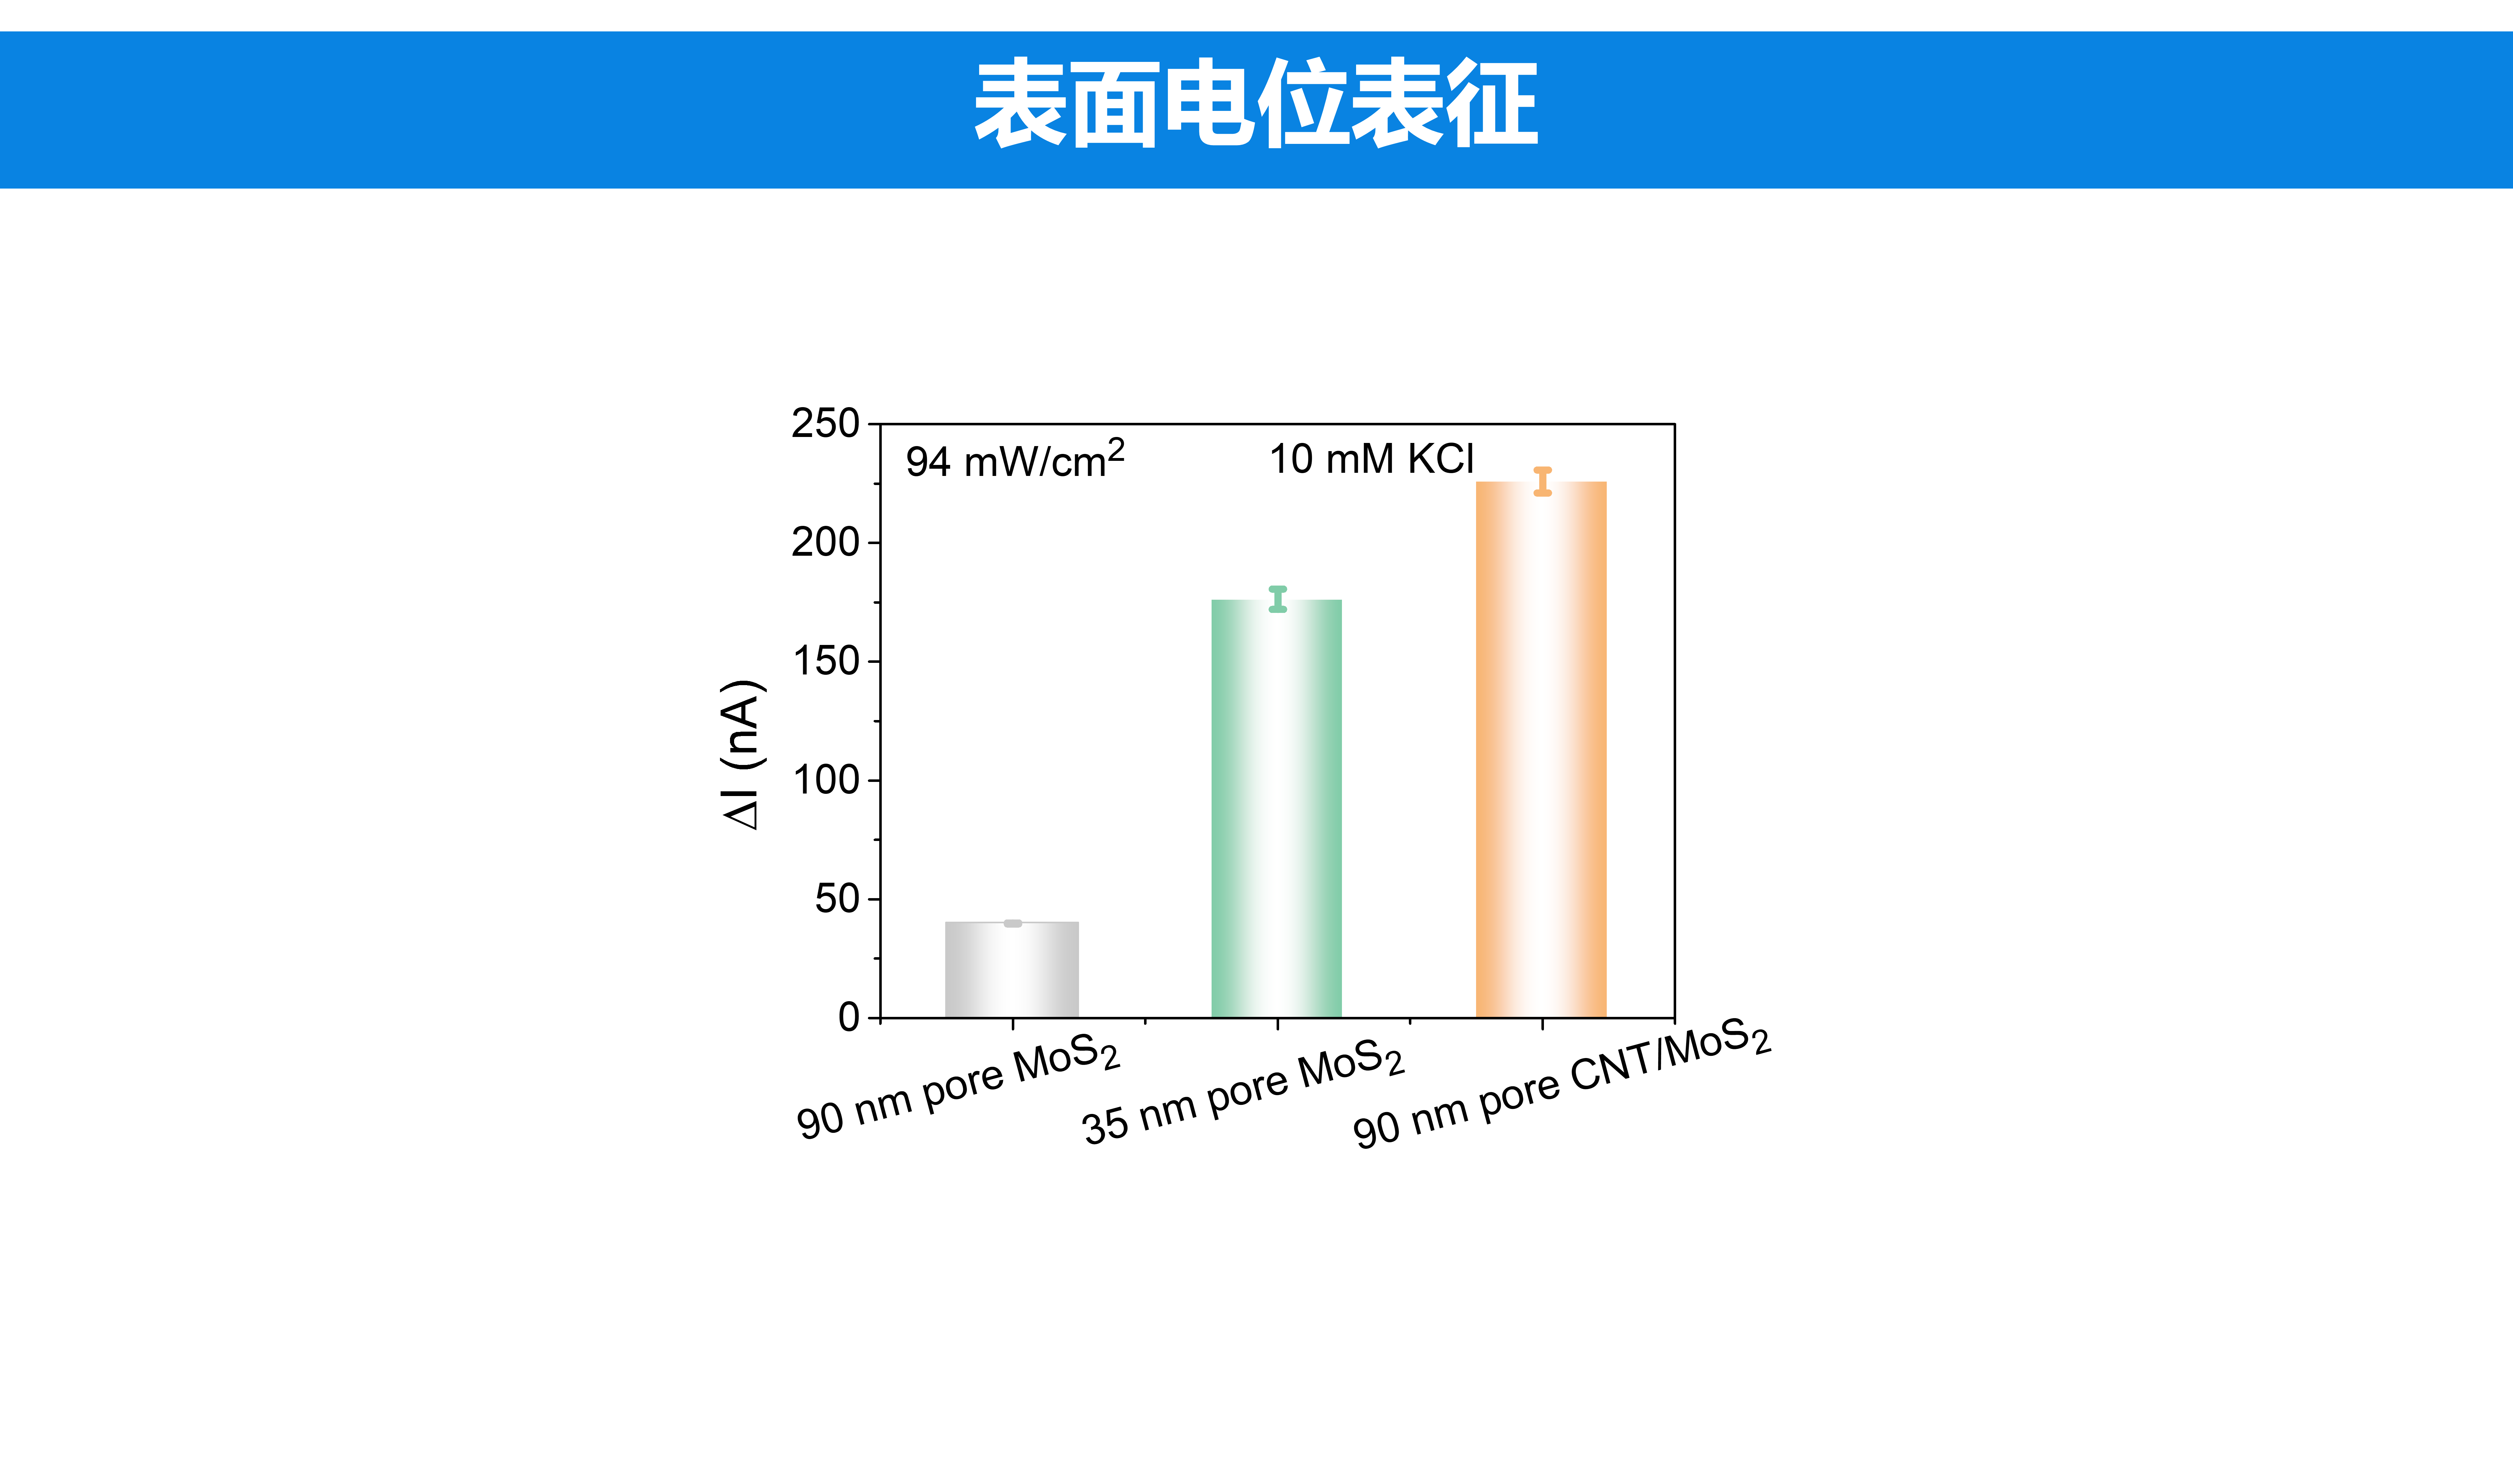


**Fig. S9.** **Ion current variations of three distinct nanotube nanostructures**.


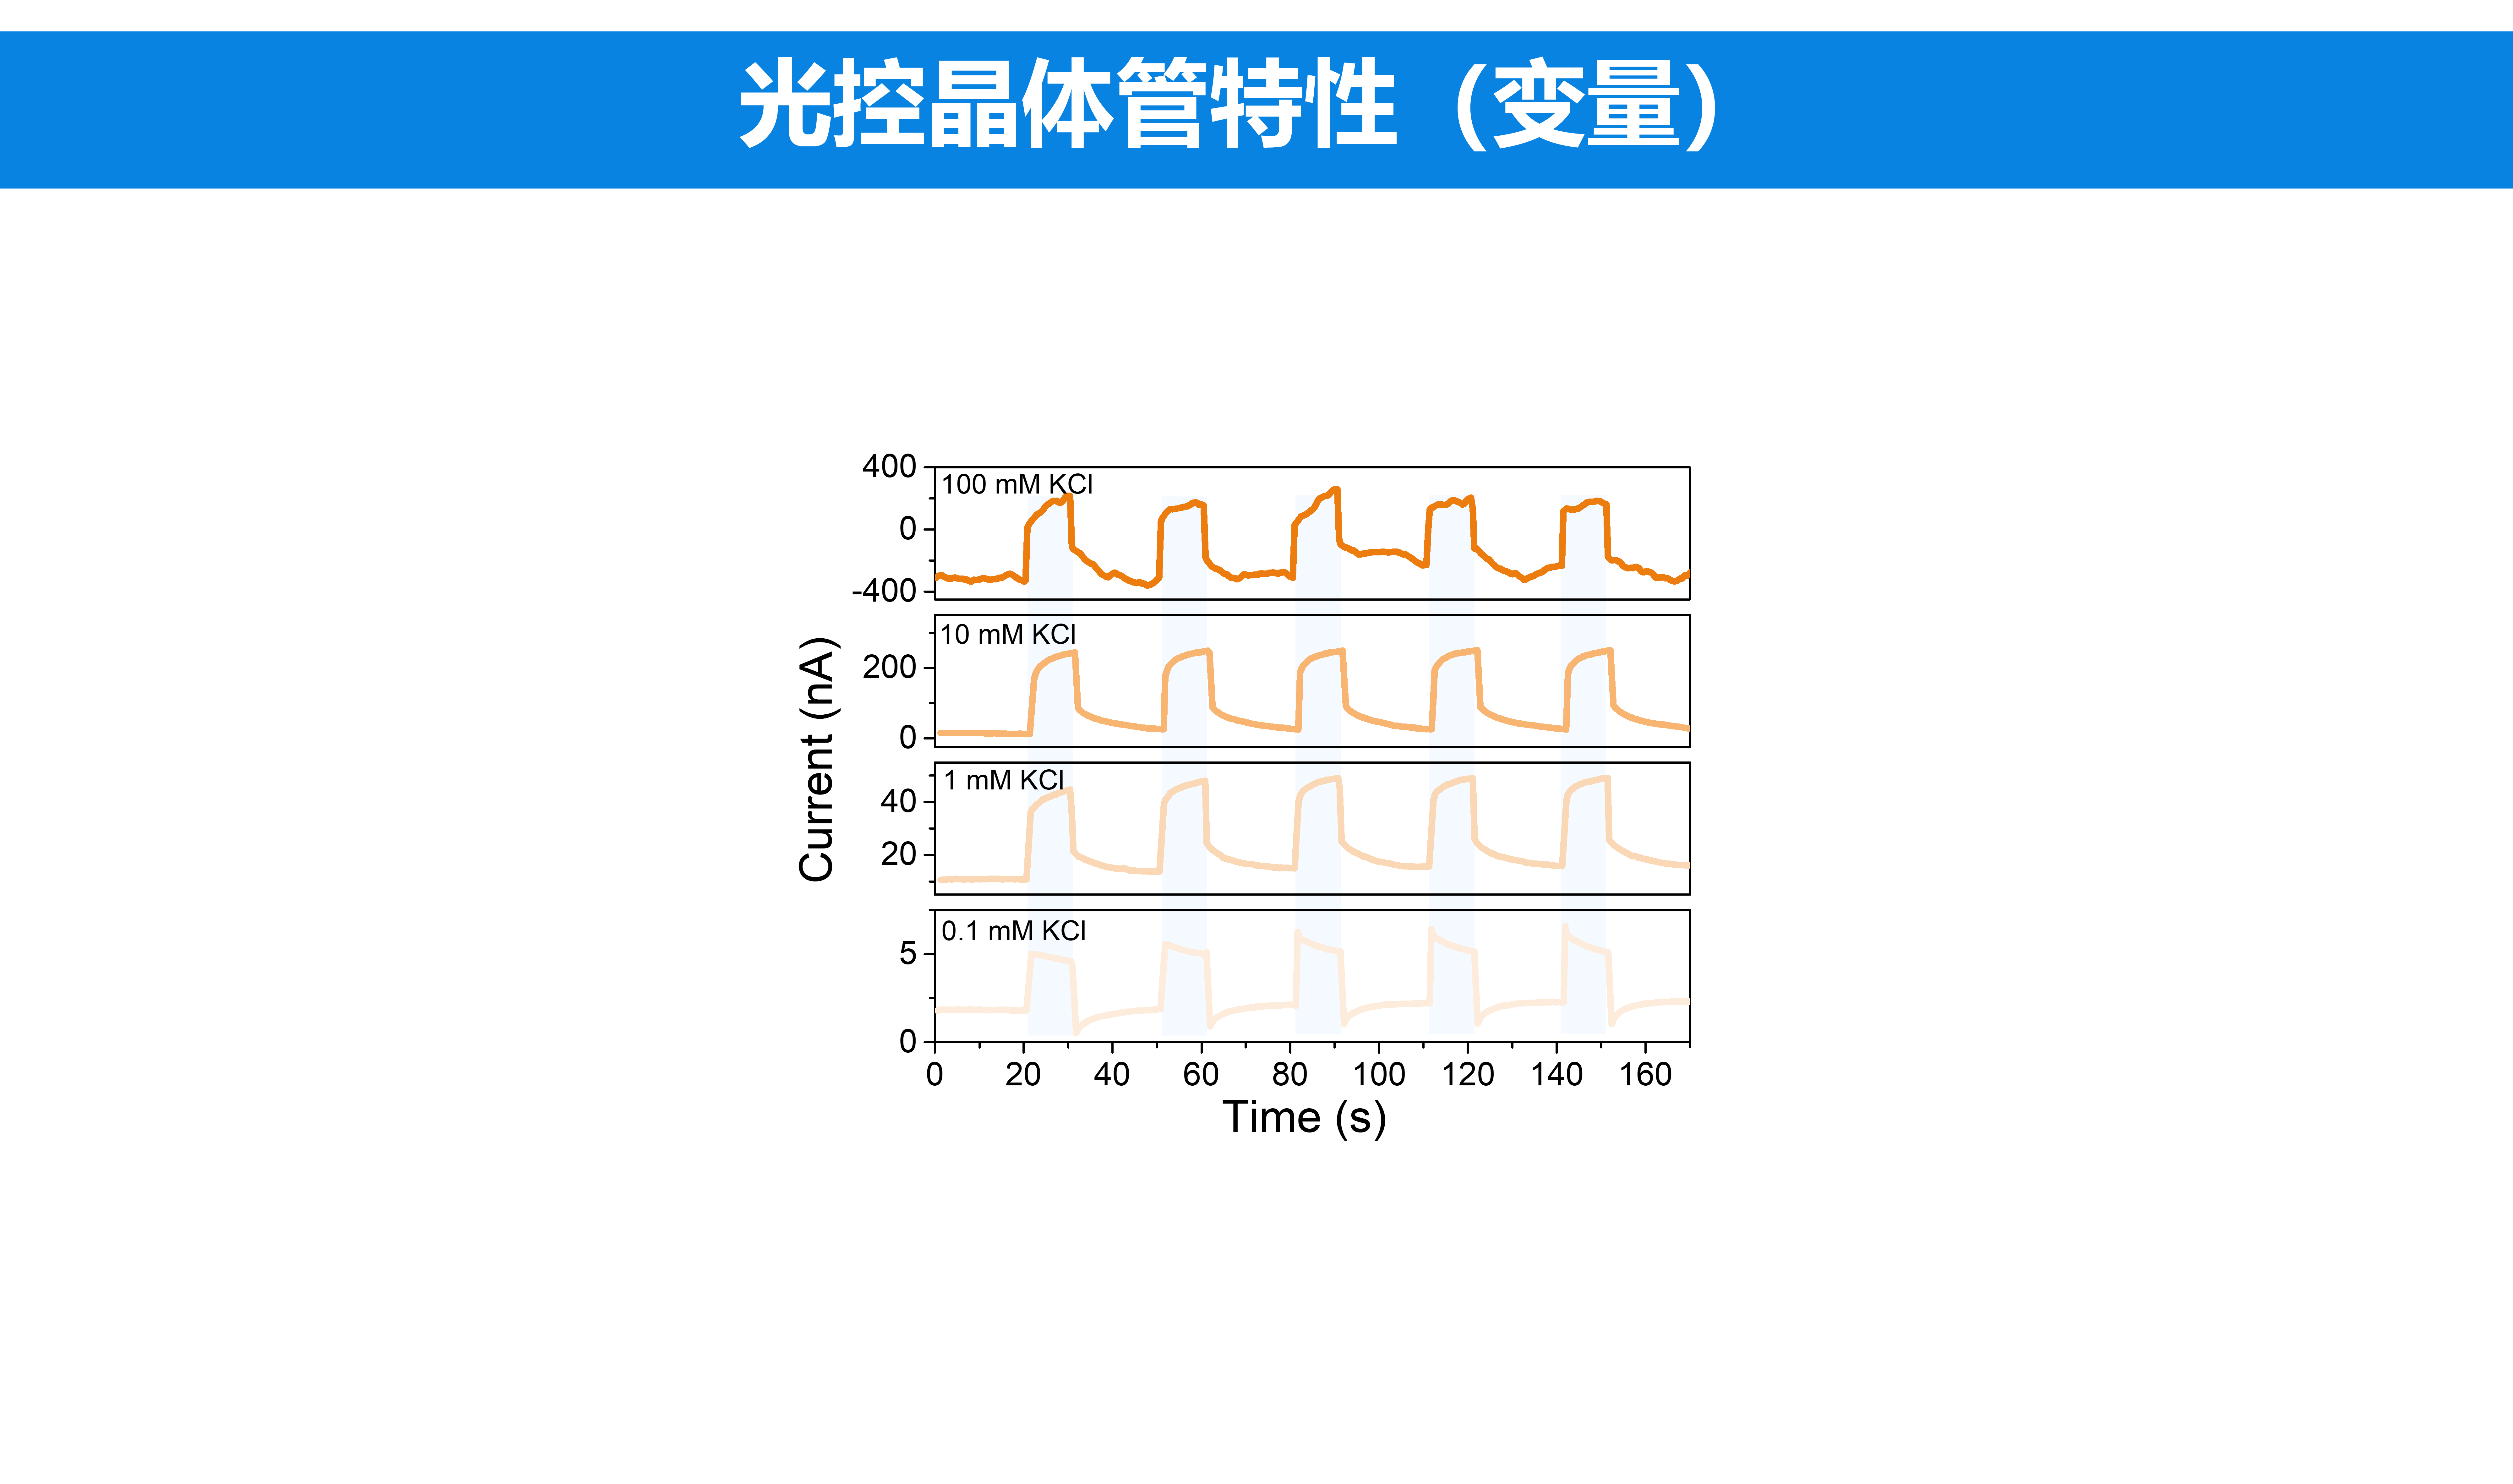


**Fig. S10. Ion current variations as a function of KCl electrolyte with concentrations from 0.1mM to 100 mM**


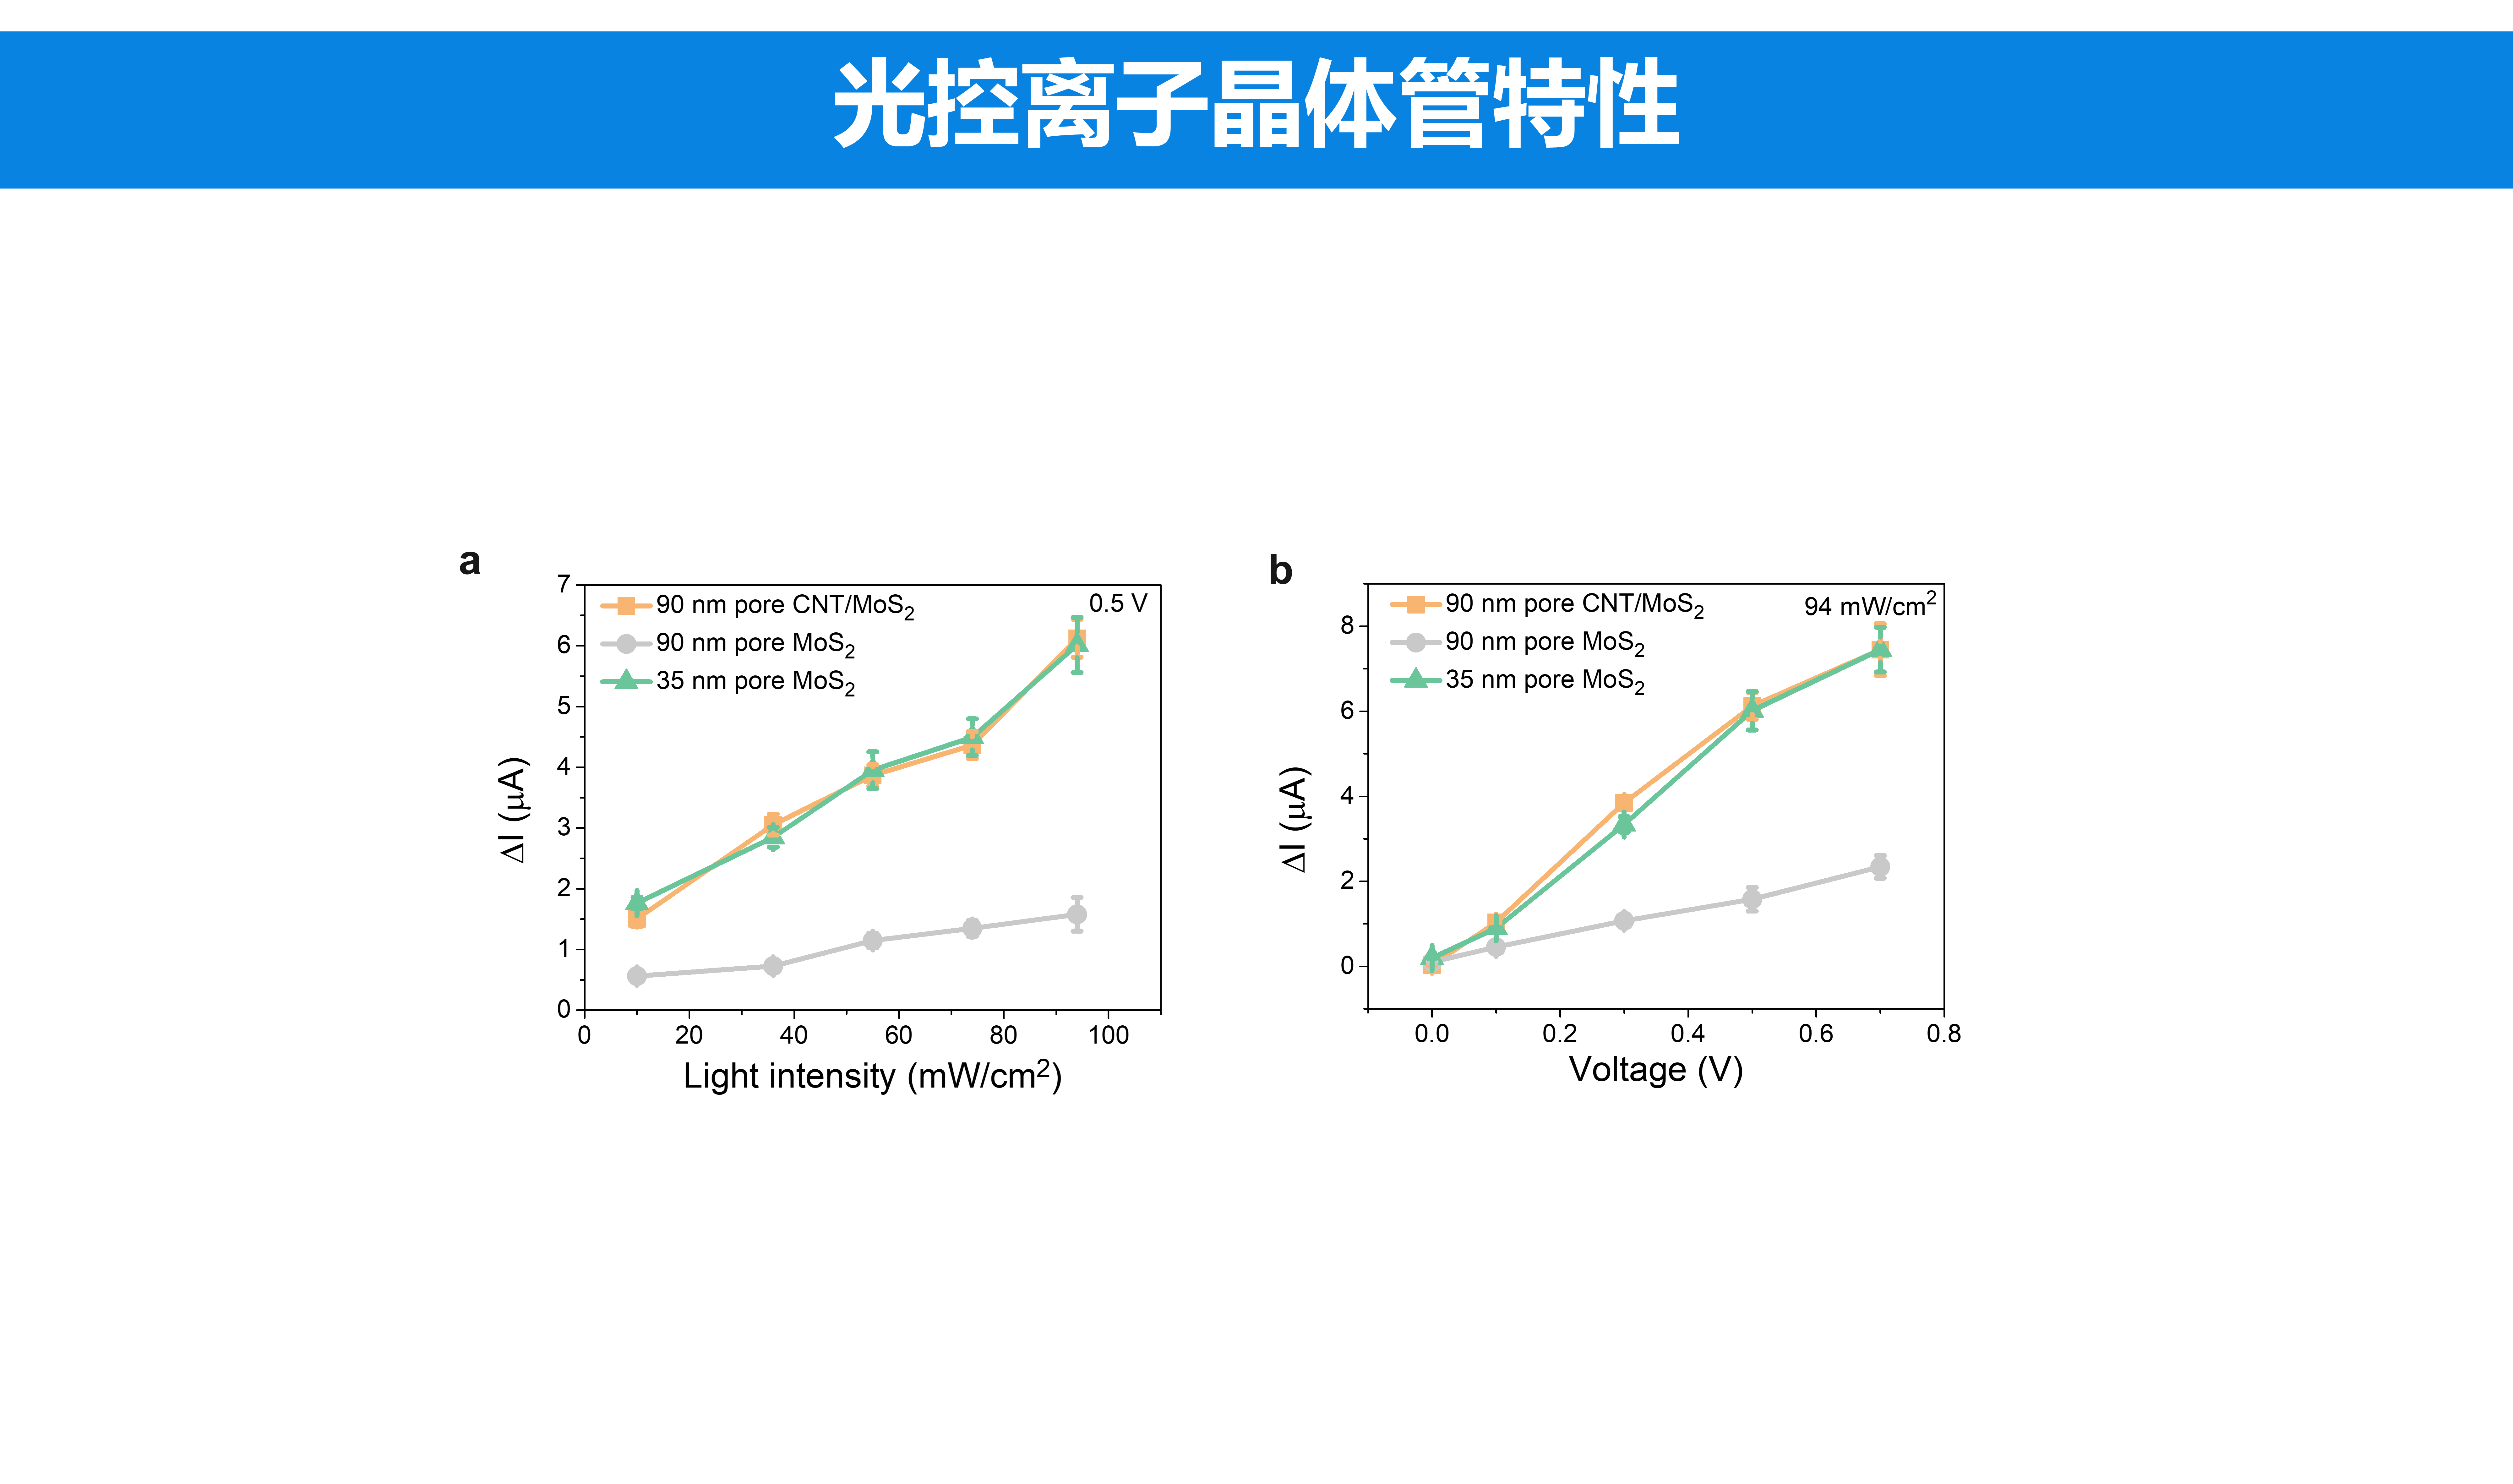


**Fig. S11. Ion current variations of three distinct nanotube nanostructures.** **a,** Ion current variations as a function of light density of 10 mW/cm2, 36 mW/cm2, 55 mW/cm2, 74 mW/cm2, and 94 mW/cm2 under a fixed bias voltage of 0.5 V; **b,** Ion current variations as a function of bias voltage of 0.1 V, 0.3 V, 0.5 V, and 0.7 V under a fixed light density of 94 mW/cm2.

**
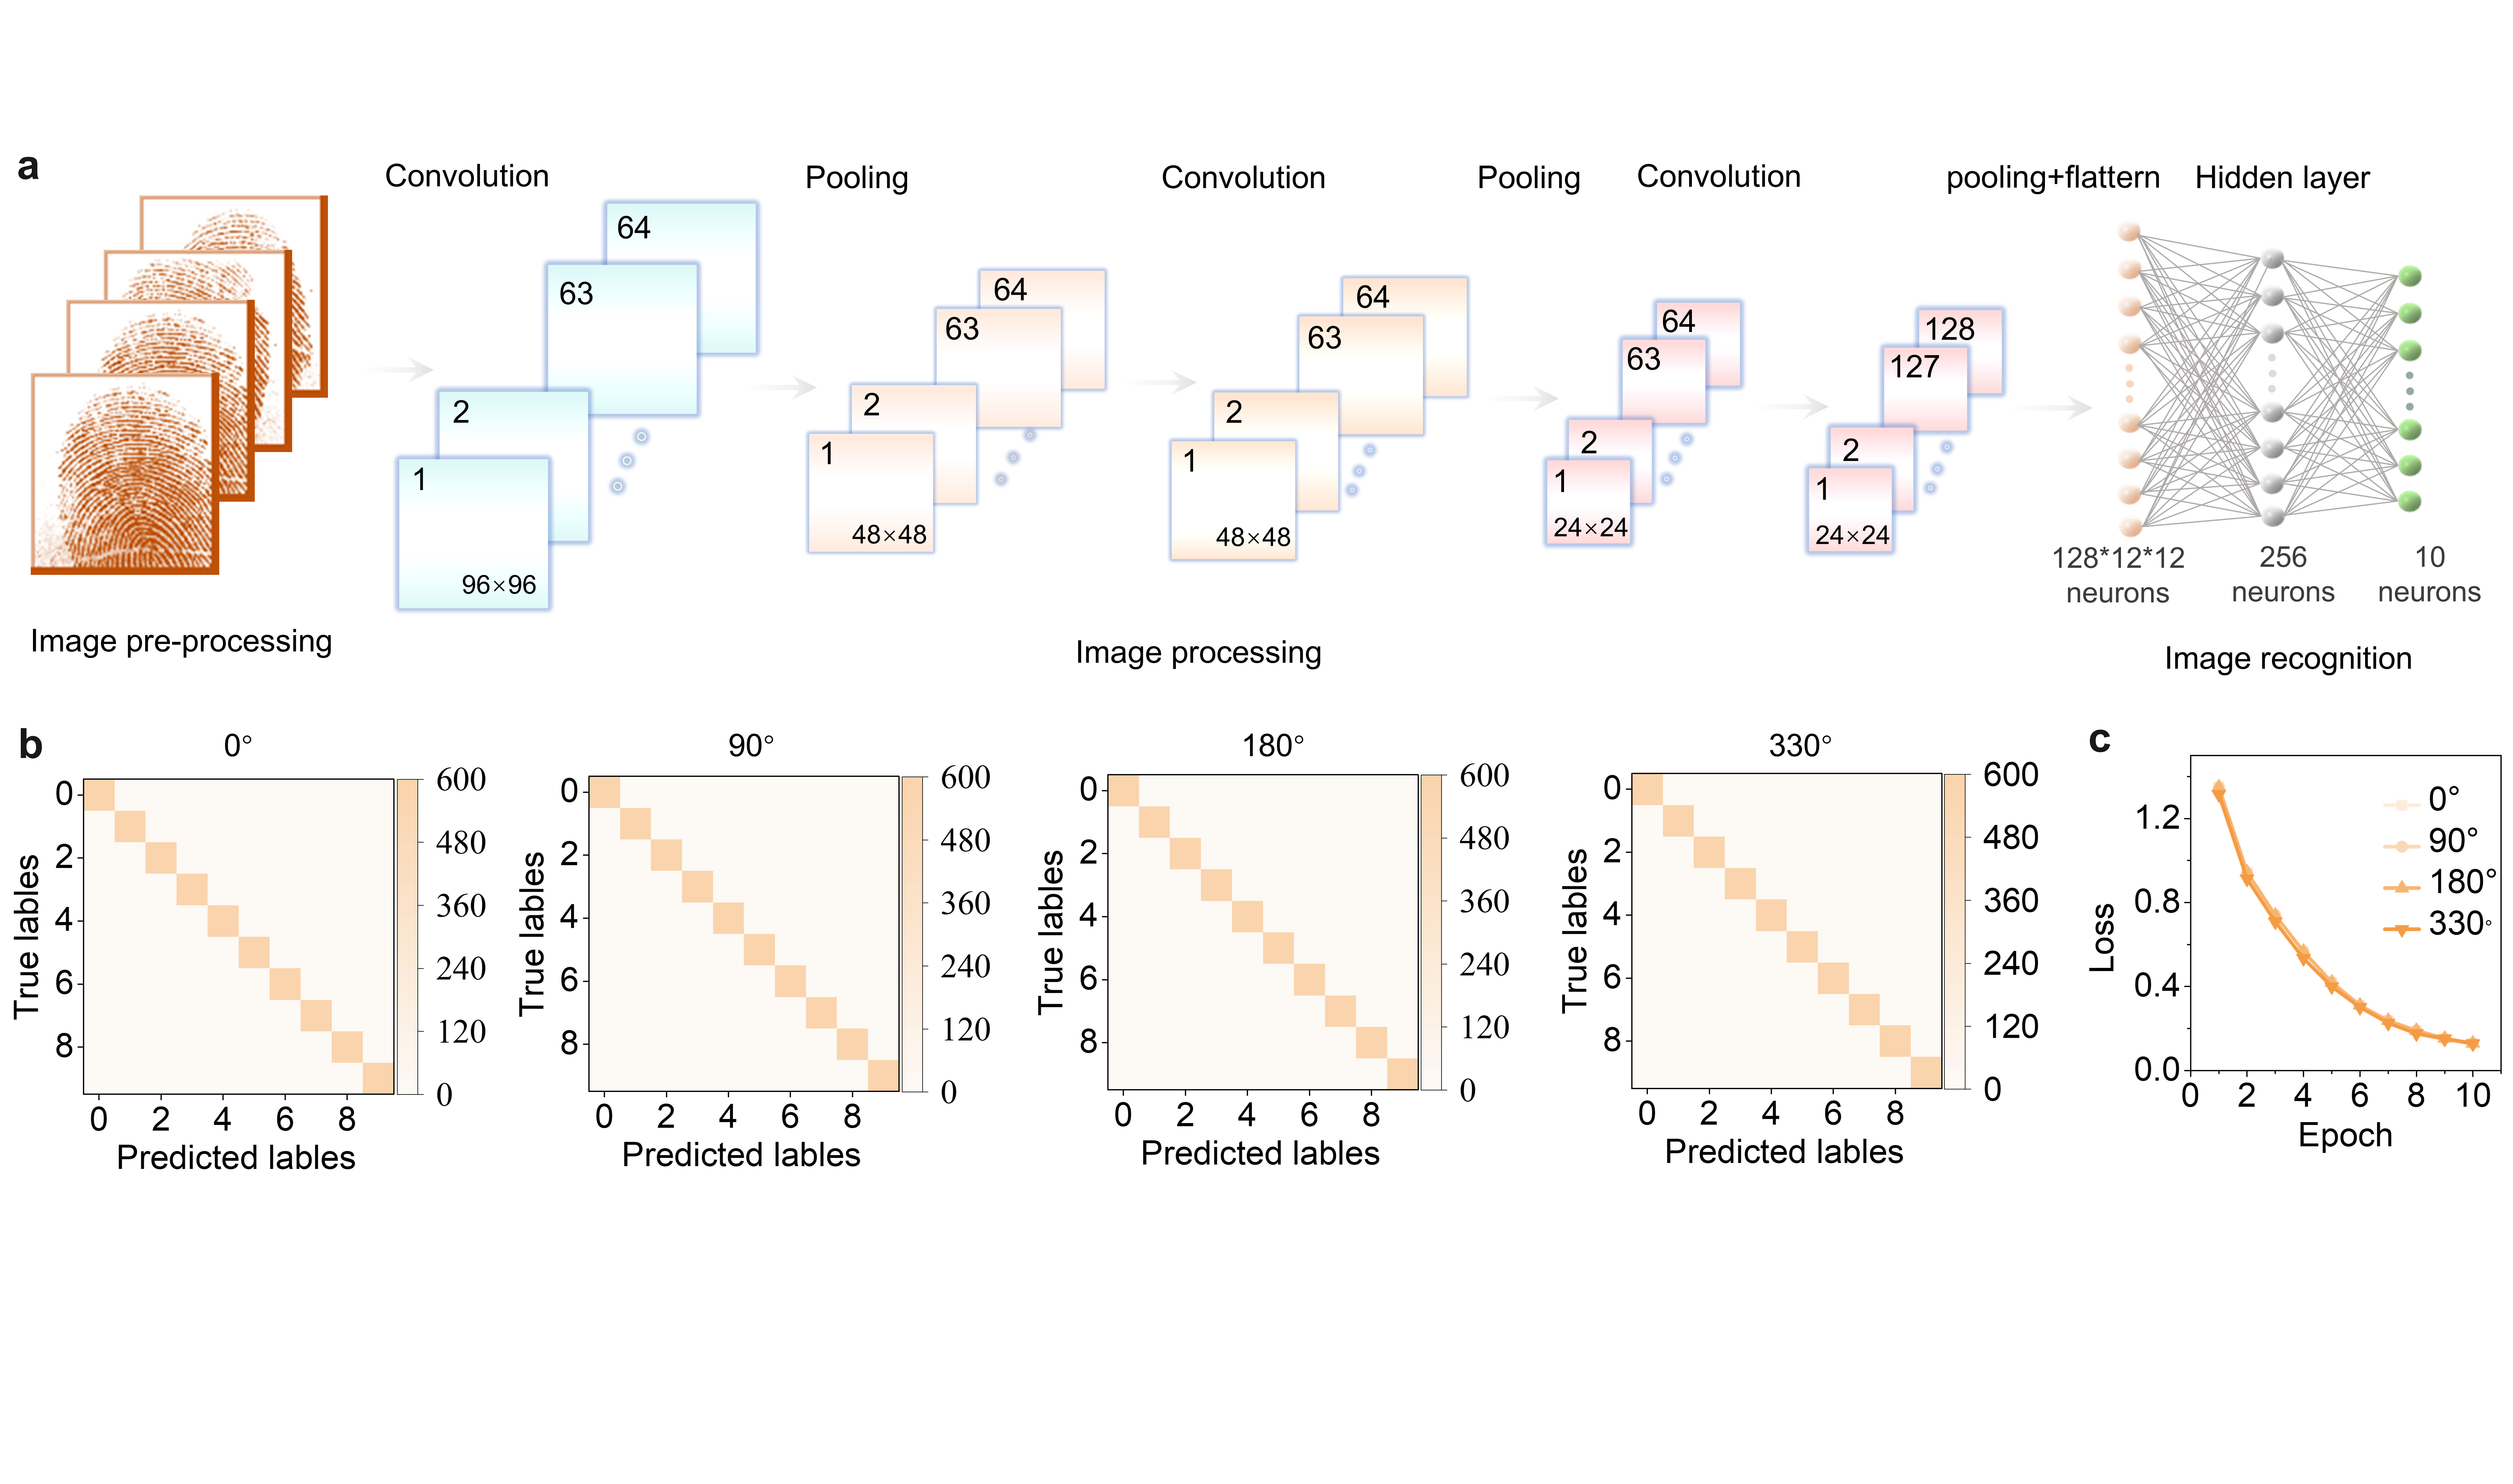
**

**Fig. S12. Reliable fingerprint detection of nanofluidic iontronic.** **a,** Schematic illustration of bioinspired vision system with CNN based on light-regulated nanofluidic iontronic platform for fingerprint detection. **b,** Confusion matrix between the predicted lables and true lables. **c,** Evolution of the loss function with training epochs.The model was trained and evaluated using the Sokoto Coventry Fingerprint Dataset, comprising 40,000 training images and 6,000 test images (each 96×96 pixels in dimension), encompassing ten distinct fingerprint classes. Training employed a batch size of 64 per epoch. The fingerprint images captured at five distinct angular orientations following processing by the system.
